# Supplementary material for: A general method for the development of multicolor biosensors with large dynamic ranges
Source: PubMed Central journal article supplement (PMC10449634; doi:10.1038/s41589-023-01350-1), 2023-06-08
Supplement: 41589_2023_1350_MOESM1_ESM.pdf [file 41589_2023_1350_MOESM1_ESM.pdf]

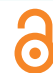

# A general method for the development of multicolor biosensors with large dynamic ranges

In the format provided by the authors and unedited

## Table of Contents

|                                                                                                                           |           |
|---------------------------------------------------------------------------------------------------------------------------|-----------|
| <b>Supplementary Figures</b> .....                                                                                        | <b>3</b>  |
| Supplementary Figure 1 Initial design of the chemogenetic FRET pair .....                                                 | 3         |
| Supplementary Figure 2 Sensitivity of ChemoG <sub>SIR</sub> to environmental changes.....                                 | 4         |
| Supplementary Figure 3 ChemoG performance in fluorescence microscopy .....                                                | 5         |
| Supplementary Figure 4 Impact of the fluorophore structure on the FRET efficiency of ChemoG5.....                         | 6         |
| Supplementary Figure 5 Implementation of different RFPs into the calcium sensor design .....                              | 7         |
| Supplementary Figure 6 Overexpression of calmodulin-based calcium sensors reduces intracellular calcium oscillations..... | 8         |
| Supplementary Figure 7 Emission spectra of ChemoB-NAD and ChemoR-NAD .....                                                | 9         |
| Supplementary Figure 8 Performance of ChemoB-NAD and ChemoR-NAD in U-2 OS cells .....                                     | 10        |
| Supplementary Figure 9 Structural comparison of ChemoG and HaloTag7 <sup>P174W</sup> .....                                | 11        |
| Supplementary Figure 10 ChemoL sensor performances in U-2 OS cells .....                                                  | 12        |
| Supplementary Figure 11 Development of ChemoG biosensors.....                                                             | 13        |
| Supplementary Figure 12 Tuning the spectral properties of the optimized ChemoG sensor .....                               | 14        |
| Supplementary Figure 13 Tuning the readout mode of the optimized ChemoG sensor .....                                      | 14        |
| <b>Supplementary Tables</b> .....                                                                                         | <b>15</b> |
| Supplementary Table 1 FRET efficiencies of the ChemoG interface variants .....                                            | 15        |
| Supplementary Table 2 FRET ratios of ChemoX constructs expressed in U-2 OS cells .....                                    | 16        |
| Supplementary Table 3 FRET efficiencies of ChemoG5 labeled with different rhodamine fluorophores .....                    | 17        |
| Supplementary Table 4 FRET efficiencies of ChemoX FRET pairs .....                                                        | 18        |
| Supplementary Table 5 Summarizing characteristics of the calcium sensors .....                                            | 19        |
| Supplementary Table 6 Summarizing characteristics of ChemoG-CaM labeled with different FRET acceptors .....               | 20        |
| Supplementary Table 7 Summarizing characteristics of ATP sensors .....                                                    | 21        |
| Supplementary Table 8 Summarizing characteristics of NAD <sup>+</sup> sensors .....                                       | 22        |
| Supplementary Table 9 Summarizing characteristics of intensimetric NAD <sup>+</sup> sensors .....                         | 23        |
| Supplementary Table 10 Summarizing characteristics of fluorescence lifetime-based NAD <sup>+</sup> sensors .....          | 24        |
| Supplementary Table 11 ChemoG FRET pairs recommended for the development of ChemoG FRET biosensors.....                   | 25        |
| Supplementary Table 12 Chemicals and reagents used in this study.....                                                     | 26        |
| Supplementary Table 13 Fluorophores used in this study.....                                                               | 28        |
| Supplementary Table 14 Plasmids and stable cell lines used in this study .....                                            | 30        |
| Supplementary Table 15 Data collection and refinement statistics.....                                                     | 32        |
| Supplementary Table 16 Spectral settings for fluorescence spectroscopy measurements .....                                 | 33        |
| Supplementary Table 17 Analyte concentration ranges used for sensor titrations .....                                      | 34        |

|                                                                                          |           |
|------------------------------------------------------------------------------------------|-----------|
| Supplementary Table 18 Settings for confocal and widefield fluorescence microscopy ..... | 35        |
| <b>Supplementary Notes</b> .....                                                         | <b>37</b> |
| Supplementary Note 1 Development of ChemoG biosensors .....                              | 37        |
| Supplementary Note 2 Tuning the spectral properties of the optimized ChemoG sensor ..... | 38        |
| Supplementary Note 3 Tuning the readout mode of the optimized ChemoG sensor .....        | 38        |
| Supplementary Note 4 Protein sequences .....                                             | 39        |
| Supplementary Note 5 Purification sequences .....                                        | 45        |
| Supplementary Note 6 Localization sequences .....                                        | 45        |
| <b>References</b> .....                                                                  | <b>46</b> |

## Supplementary Figures

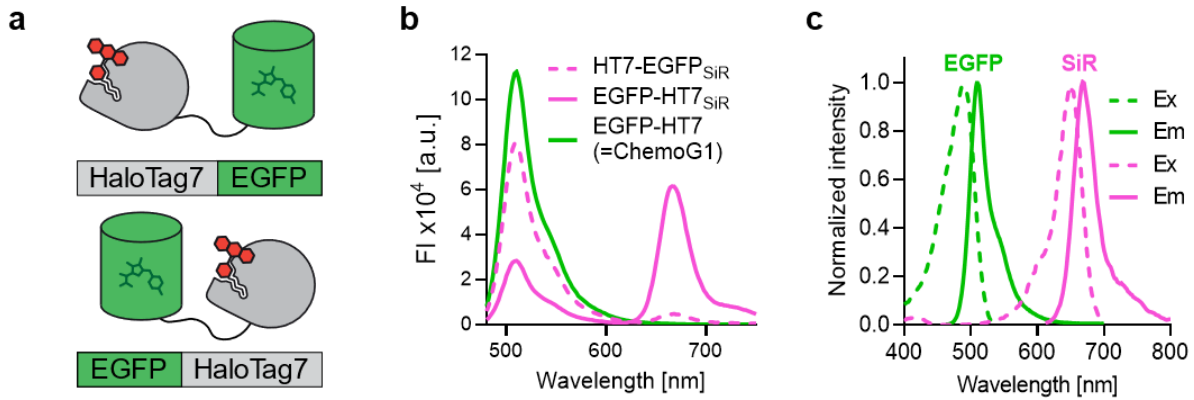

### Supplementary Figure 1 | Initial design of the chemogenetic FRET pair.

**a.** Schematic representation of the chemogenetic FRET pair based on EGFP and HaloTag7 (HT7) labeled with a synthetic rhodamine fluorophore. Shown are cartoons of the fusion of HT7 to the N- (HT7-EGFP) or C-terminus of EGFP (EGFP-HT7) **b.** Fluorescence intensity (FI) emission spectra of HT7-EGFP and EGFP-HT7 (= ChemoG1) labeled with SiR or not labeled. Represented are the means of 3 technical replicates. **c.** Normalized excitation (Ex) and emission (Em) spectra of EGFP and SiR. Represented are the means of 3 technical replicates.

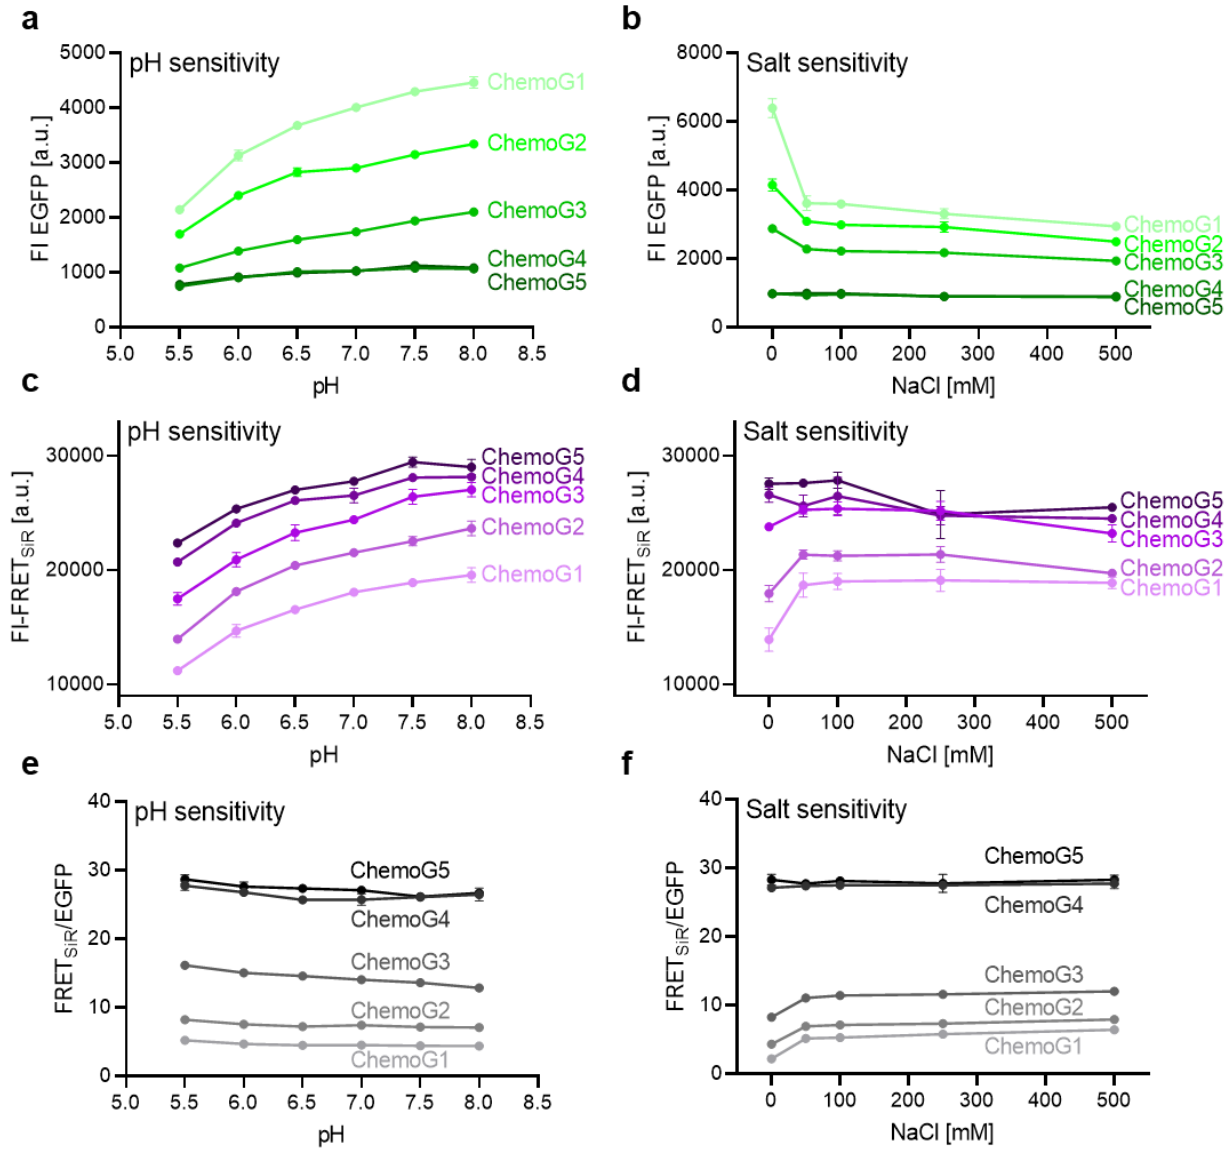

**Supplementary Figure 2 | Sensitivity of ChemoG<sub>SiR</sub> to environmental changes.**

pH (**a**, **c**, **e**) and salt (**b**, **d**, **f**) sensitivity of the fluorescence intensity of EGFP (**a**, **b**), FRET (**c**, **d**) and the FRET/EGFP ratio (**e**, **f**) of purified ChemoG constructs labeled with SiR. Shown are the means  $\pm$  s.d. of 3 technical replicates.

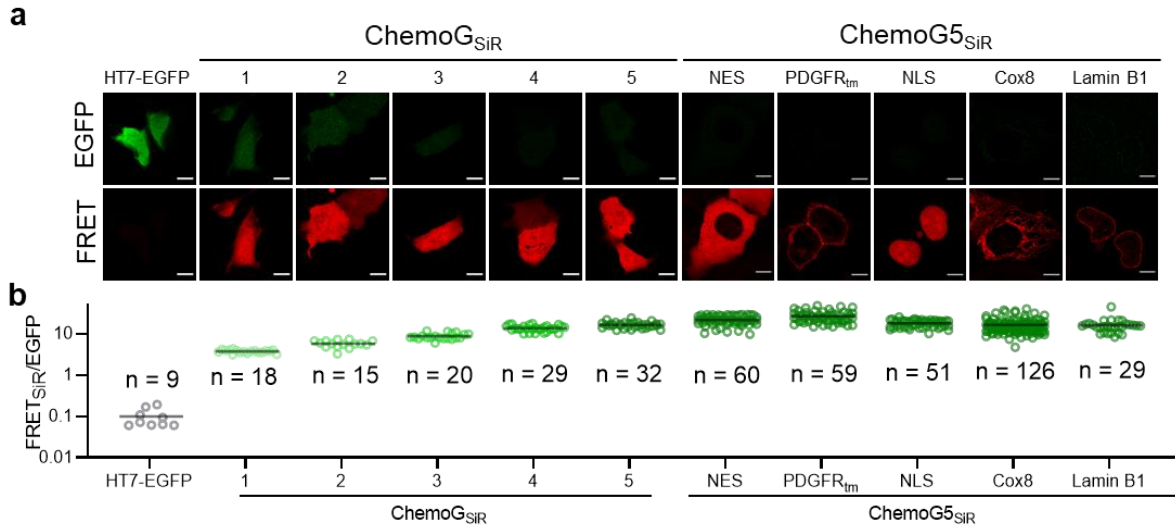

**Supplementary Figure 3| ChemoG performance in fluorescence microscopy.**

**a.** Confocal images of U-2 OS cells expressing untargeted HT7-EGFP, untargeted ChemoG1-5 or ChemoG5 targeted to different subcellular localizations. Cells were labeled with SiR. Shown are the EGFP and FRET channels. Scale bars = 10  $\mu$ m. **b.** FRET/EGFP ratios of U-2 OS cells expressing different ChemoG constructs labeled with SiR as explained in **a**. Plotted for each construct are the FRET/EGFP ratios of individual cells (circles) and the mean (black line). The number of cells acquired for each construct are indicated and are derived from 2 independent experiments.

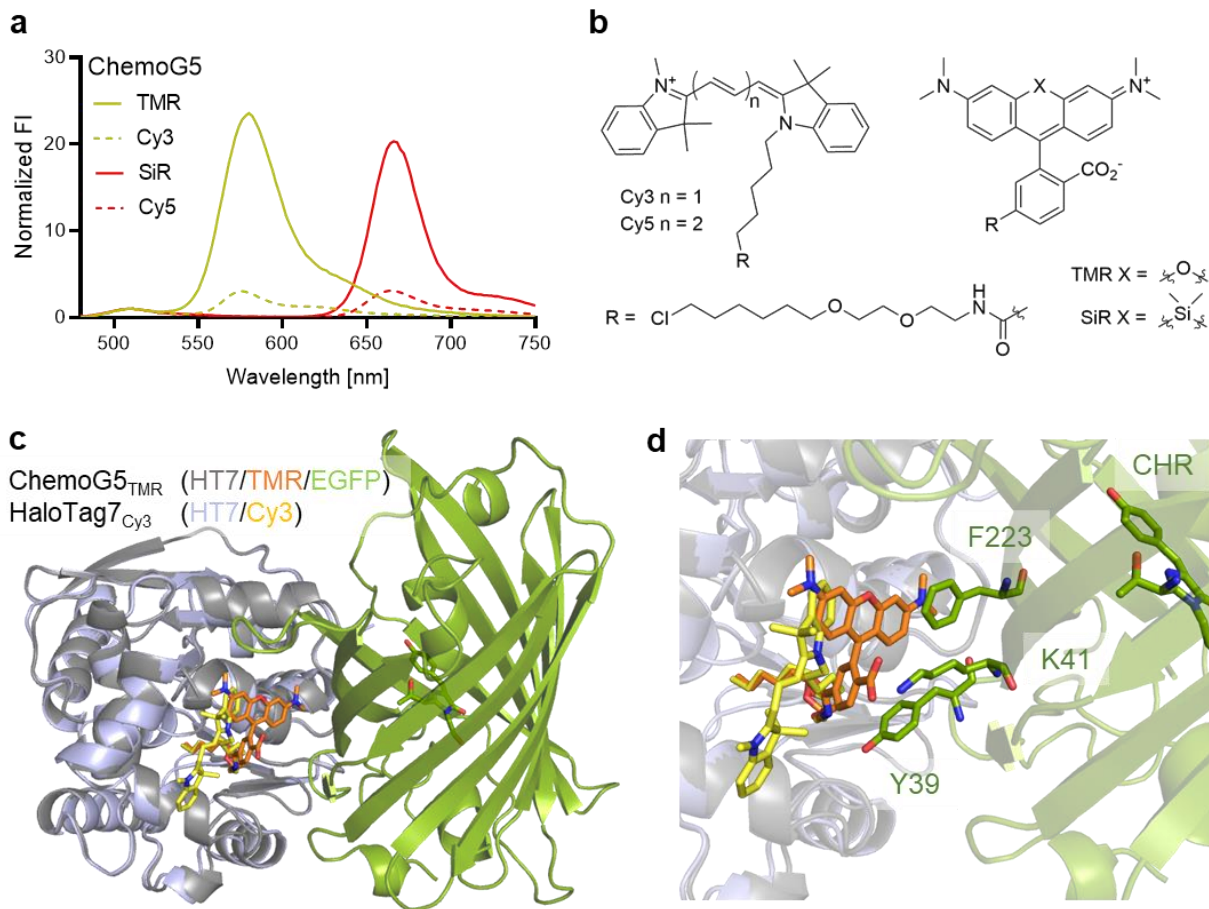

**Supplementary Figure 4| Impact of the fluorophore structure on the FRET efficiency of ChemoG5.**

**a.** Normalized fluorescence intensity (FI) emission spectra of ChemoG5 labeled with spectrally similar but structurally different fluorophores. Spectra were normalized to the maximum FI of EGFP. Shown are the means of 3 technical replicates. **b.** Chemical structures of cyanines (Cy3, Cy5) and rhodamines (TMR, SiR) coupled to the chloroalkane substrate (R) for HaloTag7. **c.** Structural comparison of the HaloTag7<sub>Cy3</sub> (PDB ID: 8B6R) and ChemoG5<sub>TMR</sub> (PDB ID: 8B6T) X-ray structures. HaloTag7<sub>Cy3</sub> was structurally aligned with the HaloTag7<sub>TMR</sub> component of ChemoG5<sub>TMR</sub>. HaloTag7 (grey or light blue) and EGFP (green) are shown as cartoon. The EGFP chromophore (green), TMR (orange) and Cy3 (yellow) are shown as sticks. **d.** Zoom-in the interface HaloTag7/EGFP with representations as described in **c.** Residues Y39, K41 and F223 of EGFP involved in the direct interaction with TMR are annotated and shown as sticks.

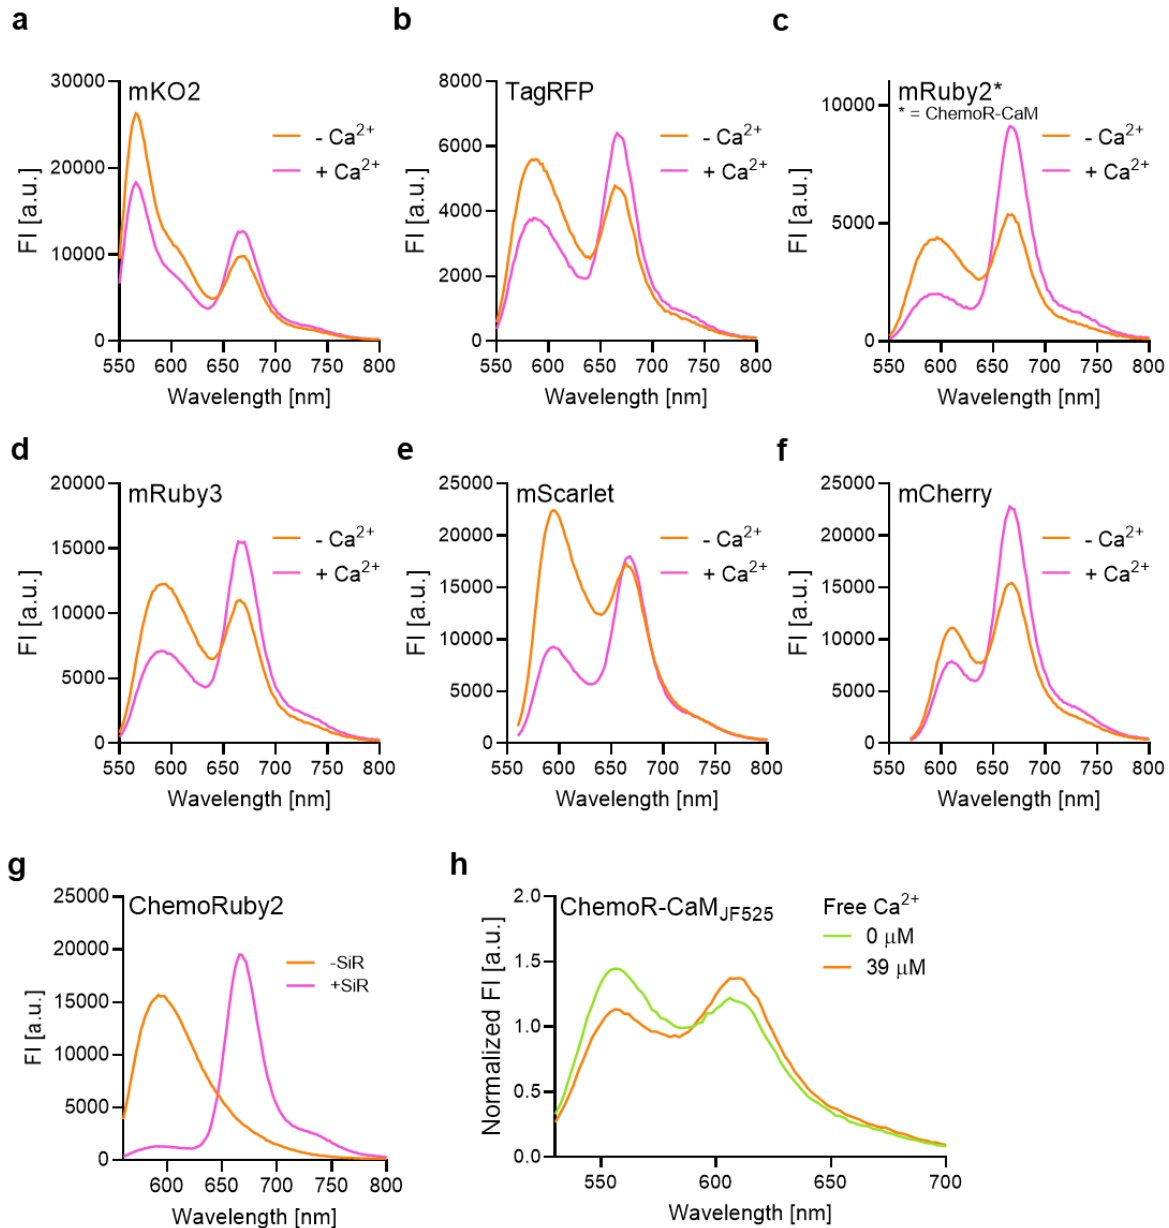

**Supplementary Figure 5 | Implementation of different RFPs into the calcium sensor design.**

**a-f.** Fluorescence intensity (FI) emission spectra of RFP-CaM/M13-HT7 sensors labeled with SiR in absence (2 mM EGTA, -Ca<sup>2+</sup>) or presence (2 mM CaCl<sub>2</sub>, +Ca<sup>2+</sup>) of free Ca<sup>2+</sup>. Different RFPs were used as FRET donor, indicated in the graph. Shown are the means of 3 technical replicates. \*mRuby2 was chosen as the final ChemoR-CaM calcium sensor. **g.** FI emission spectra of static ChemoRuby2 labeled with SiR. The FRET efficiency and FRET ratio can be found in **Supplementary Table 4**. **h.** FI emission spectra of ChemoR-CaM labeled with JF<sub>525</sub> in absence and presence of free Ca<sup>2+</sup>. JF<sub>525</sub> served as FRET donor and mRuby2 as FRET acceptor.



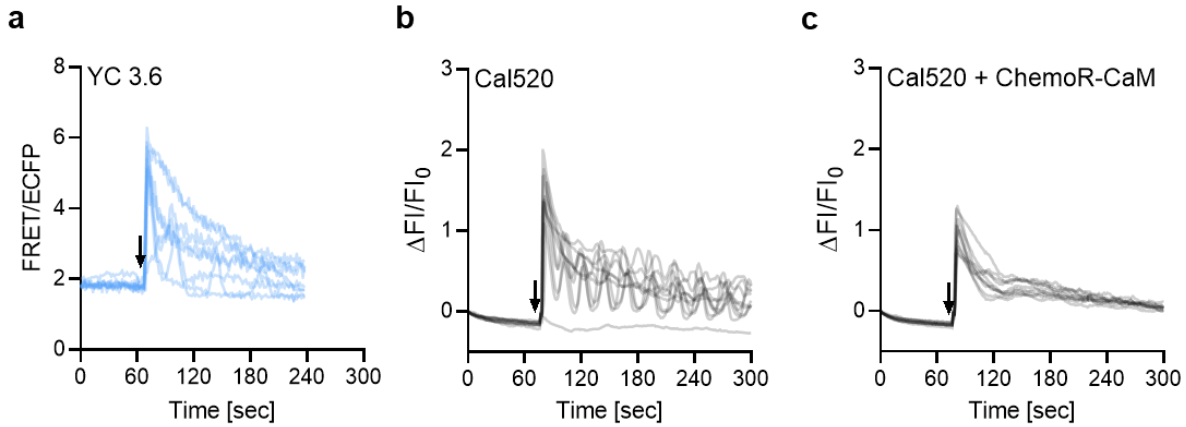

**Supplementary Figure 6| Impact of calmodulin-based calcium sensors on intracellular calcium oscillations.**

**a.** Time course measurement of free intracellular calcium fluctuations using yellow cameleon 3.6 (YC 3.6). Represented are the FRET/ECFP ratios for 8 representative single cell traces from 3 biological replicates. HeLa Kyoto cells were treated with 10  $\mu$ M histamine at the time point indicated with an arrow. Most of the cells show no or reduced calcium oscillations as observed for ChemoX-CaM (Fig. 2f). **b-c.** Time course measurements of free intracellular calcium fluctuations using the synthetic calcium indicator Cal520. HeLa Kyoto cells were transiently transfected to express ChemoR-CaM. ChemoR-CaM has been chosen to not interfere spectrally with Cal520. Ten representative single cell traces from 3 biological replicates not expressing (**b**) and expressing (**c**) ChemoR-CaM were analyzed for calcium oscillations upon treatment with 10  $\mu$ M histamine at the time point indicated with an arrow. Represented are the fluorescence intensity changes ( $\Delta F/F_0$ ) of Cal520. Cells that did not express ChemoR-CaM mostly highlight calcium oscillations while the expression of ChemoR-CaM seem to repress this behavior as for YC 3.6, which is as well a calmodulin-based calcium sensor. This phenomenon was already reported in the literature and seems to occur through calcium buffering due to the sensor over-expression<sup>21</sup>.

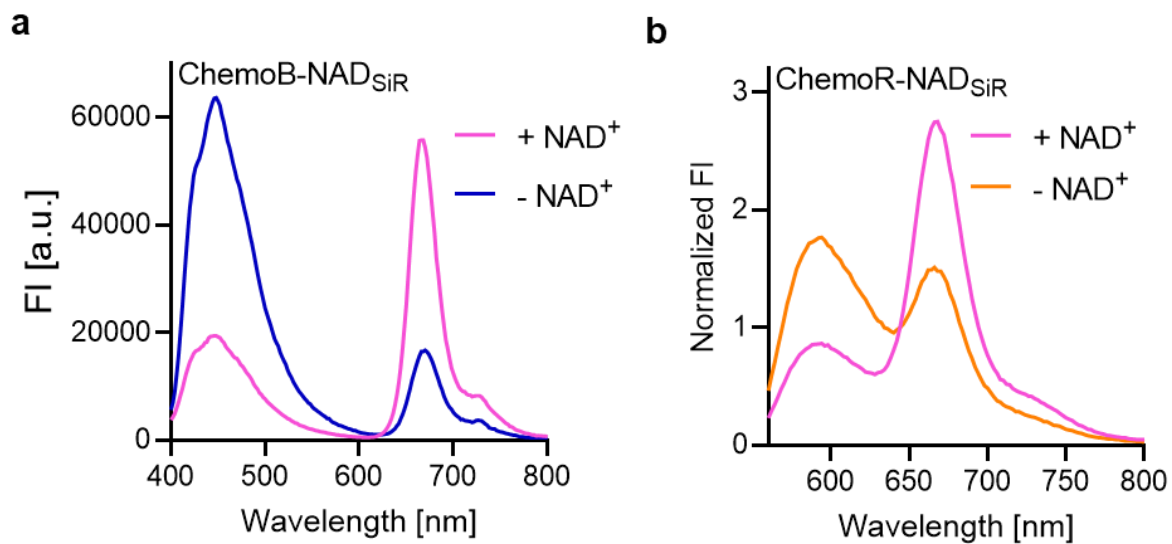

**Supplementary Figure 7 | Emission spectra of ChemoB-NAD and ChemoR-NAD.**

**a, b.** Fluorescence intensity (FI) emission spectra of SiR-labeled ChemoB-NAD (**a**) and ChemoR-NAD (**b**) in presence or absence of 1 mM NAD<sup>+</sup>. Shown are the means of 3 technical replicates.

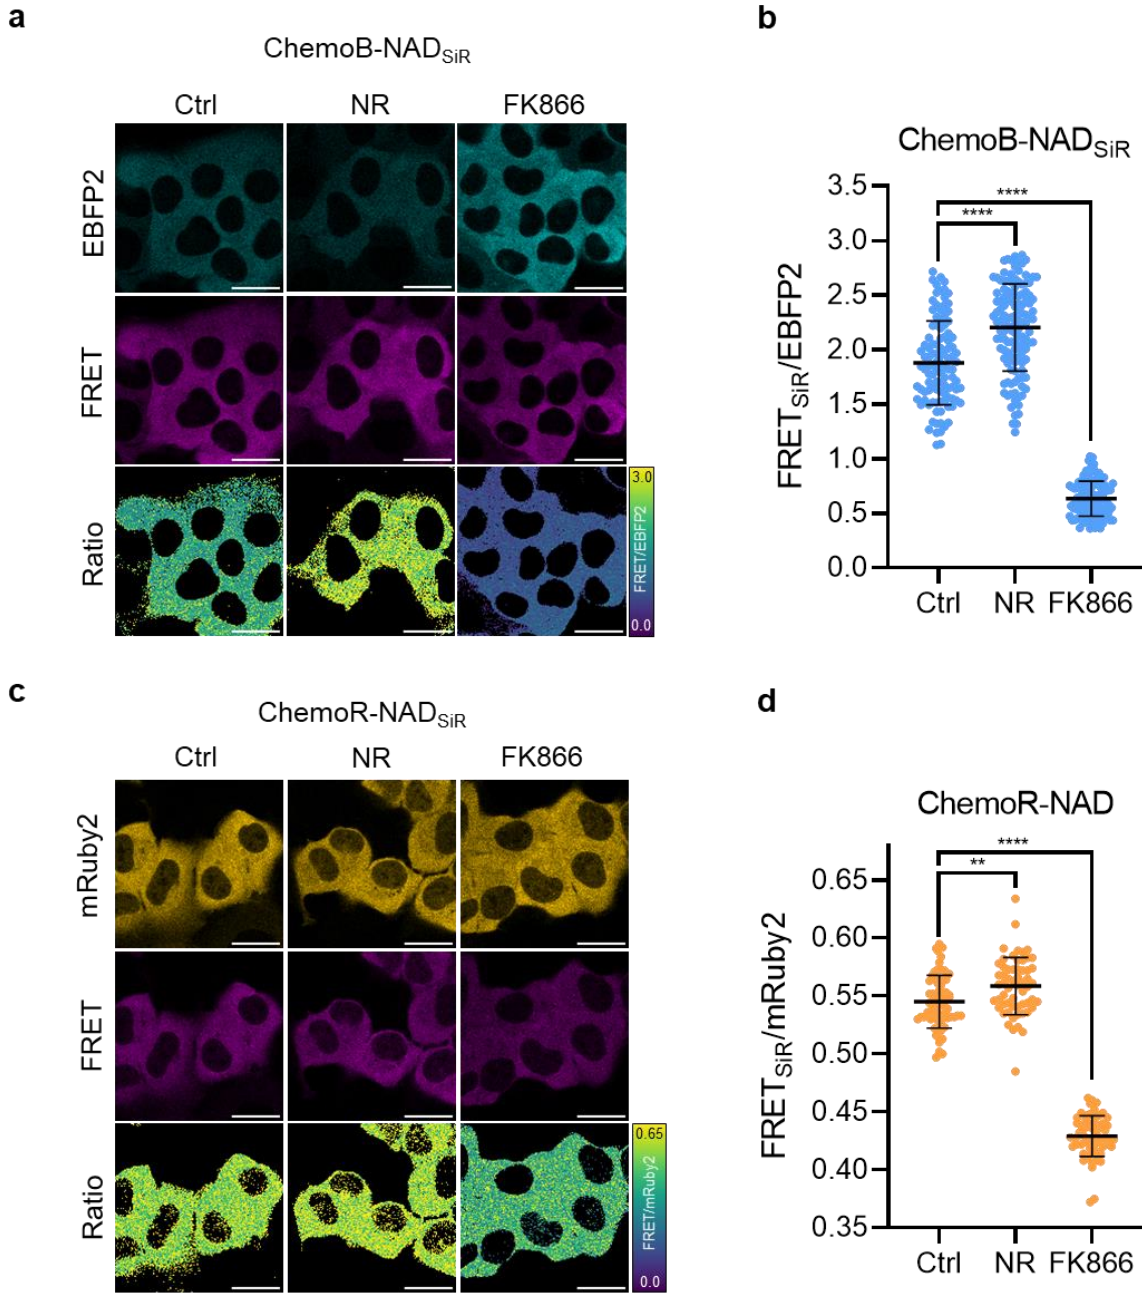

**Supplementary Figure 8 | Performance of ChemoB-NAD and ChemoR-NAD in U-2 OS cells.**

**a, c.** Confocal images of U-2 OS cells expressing ChemoB-NAD (**a**) or ChemoR-NAD (**c**) in the cytosol labeled with SiR. Shown are the respective FP channel, FRET channel and ratio image (FRET/FP) in pseudocolor (LUT = mpl-viridis). Cells were treated for 24 h either with DMSO (Ctrl), 100 nM FK866 or 1 mM NR. All scale bars = 25  $\mu$ m. **b, d.** FRET/FP ratios of U-2 OS cells corresponding to panels **a** and **c**, respectively. Shown are the FRET/FP values of single cells (circles) and the mean  $\pm$ s.d. (black line) (ChemoB-NAD: n = 107 (ctrl), 127 (NR), 113 (FK866) cells; ChemoR-NAD, n = 66 (ctrl), 59 NR), 62 (FK866) cells; from 3 independent experiments). p-values are given based on unpaired two-tailed t-test with Welch's correction (\*\*\*\* p<0.0001, \*\* p = 0.0021).

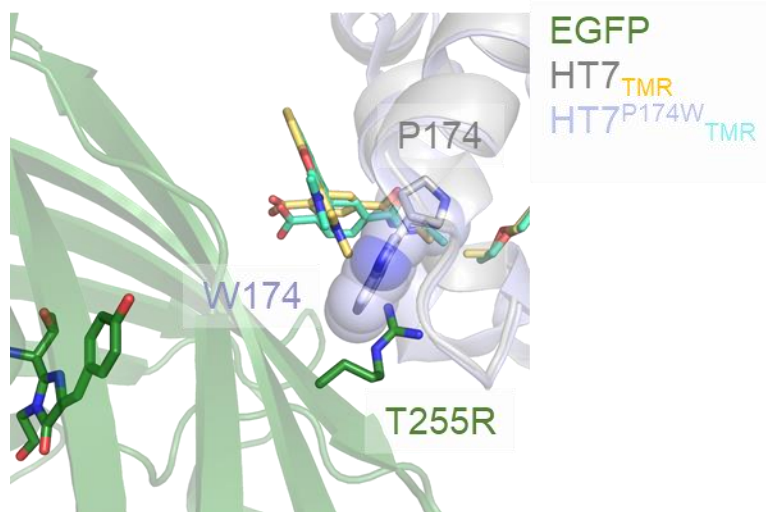

**Supplementary Figure 9| Structural comparison of ChemoG and HaloTag7<sup>P174W</sup>.**

Zoom-in of the X-ray structure of ChemoG5<sub>TMR</sub> (PDB ID: 8B6T) overlaid with the X-ray structure of HaloTag7<sup>P174W</sup><sub>TMR</sub> (PDB ID: 6ZVV). The EGFP chromophore (green), EGFP surface residue T225R (green), HaloTag7 residues (grey or slate) and TMR (orange or cyan) are shown as sticks. The atoms of the surface residue W174 of HaloTag7<sup>P174W</sup> are additionally shown as spheres to visualize the steric clash with T225R of EGFP in the current conformation, suggesting the necessity of a conformational change in the closed form of the ChemoD-NAD sensor.

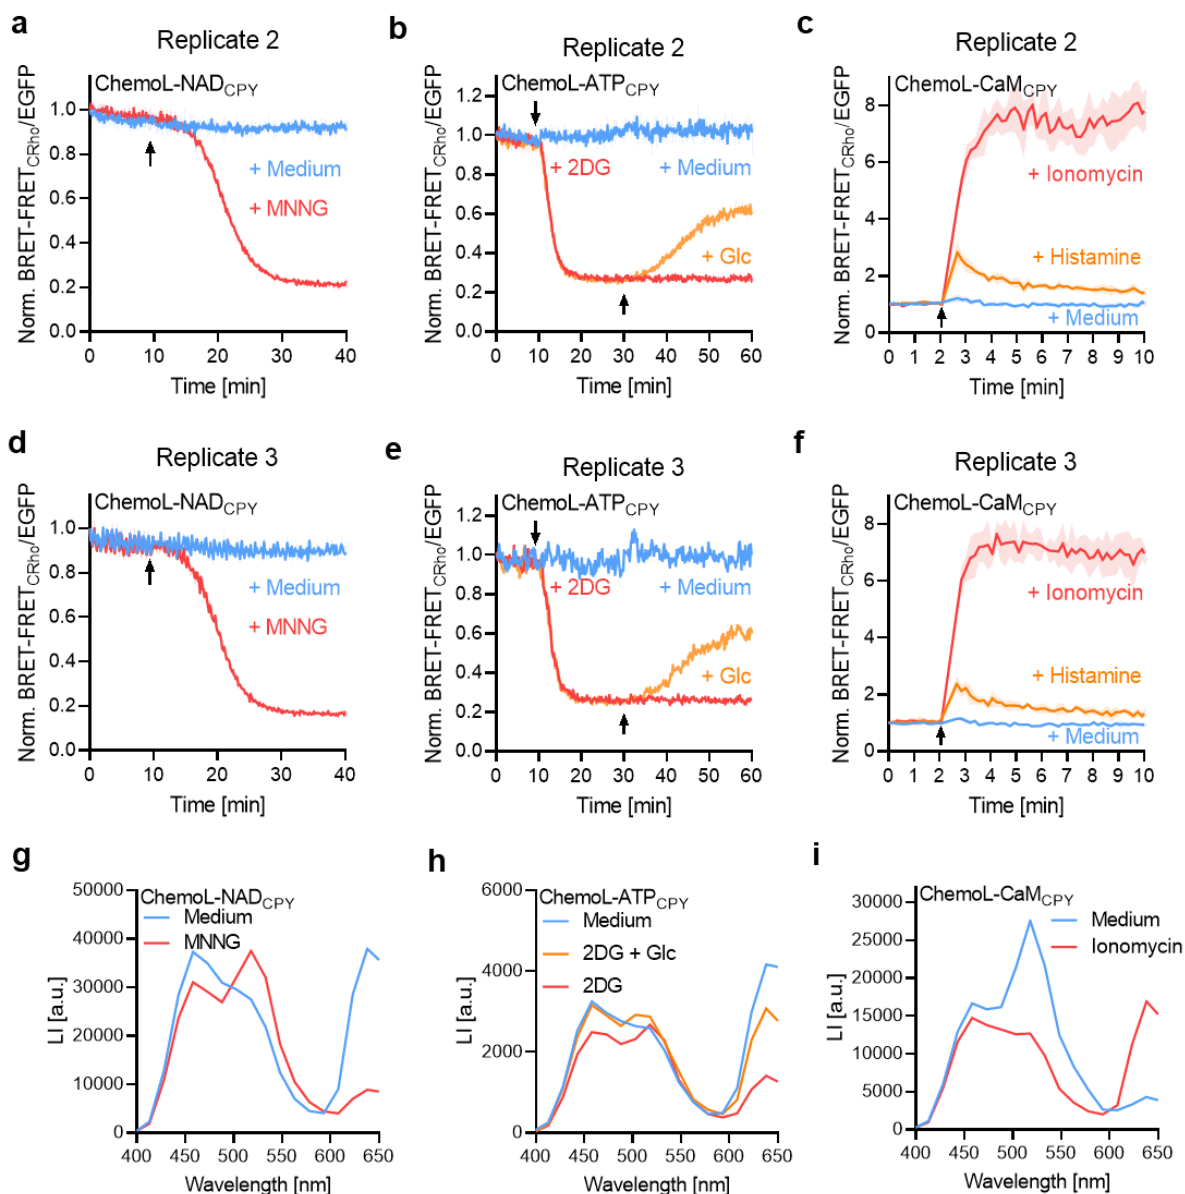

**Supplementary Figure 10 | ChemoL sensor performances in U-2 OS cells.**

**a-f.** Time course measurements of ChemoL sensors expressed in U-2 OS cells (ChemoL-NAD, **a, d**) or HeLa Kyoto cells (ChemoL-ATP (**b, e**) and ChemoL-CaM (**c, f**)) upon drug treatments. Sensors were labeled with CPY. Represented are the BRET-FRET/EGFP ratios normalized to 1 at  $t = 0$  min. Cells were untreated (+ medium) or treated with different reagents indicated with an arrow ( $n = 3$  wells for each condition of each experiment). Represented are the mean (solid line) and the standard deviation (shade areas). The treatments are identical to time courses in **Fig. 6e-g**. **g-i.** Luminescent intensity (LI) spectra of ChemoL-NAD (**g**), ChemoL-ATP (**h**) or ChemoL-CaM (**i**) expressed in U-2 OS cells (ChemoL-NAD) or HeLa Kyoto cells (ChemoL-ATP and ChemoL-CaM). Sensors were labeled with CPY. The treatments are identical to time courses in **Fig. 6e-g**. Spectra were acquired immediately after the duration of the time courses (ChemoL-NAD = 40 min, ChemoL-ATP = 60 min, ChemoL-CaM = 10 min).

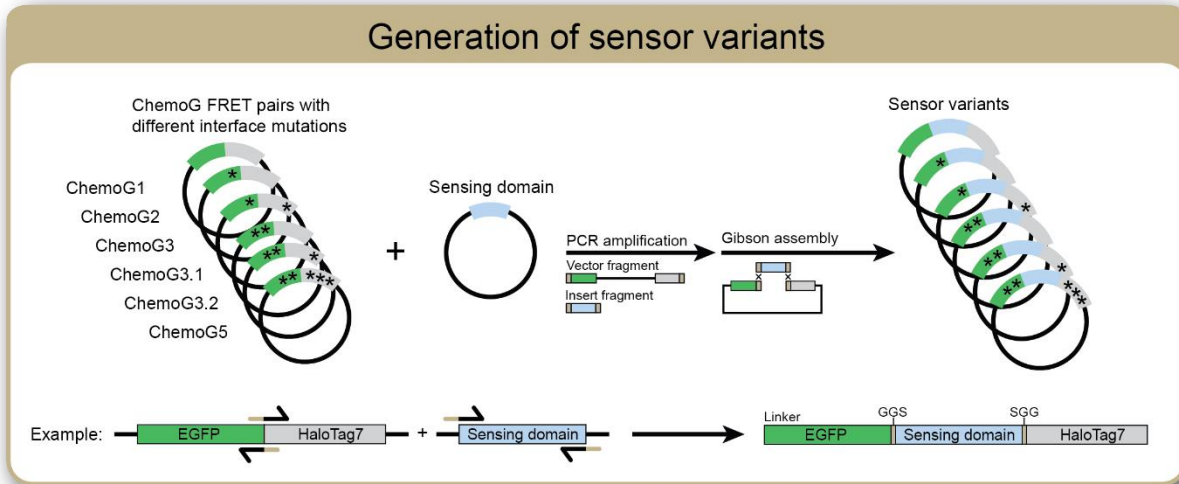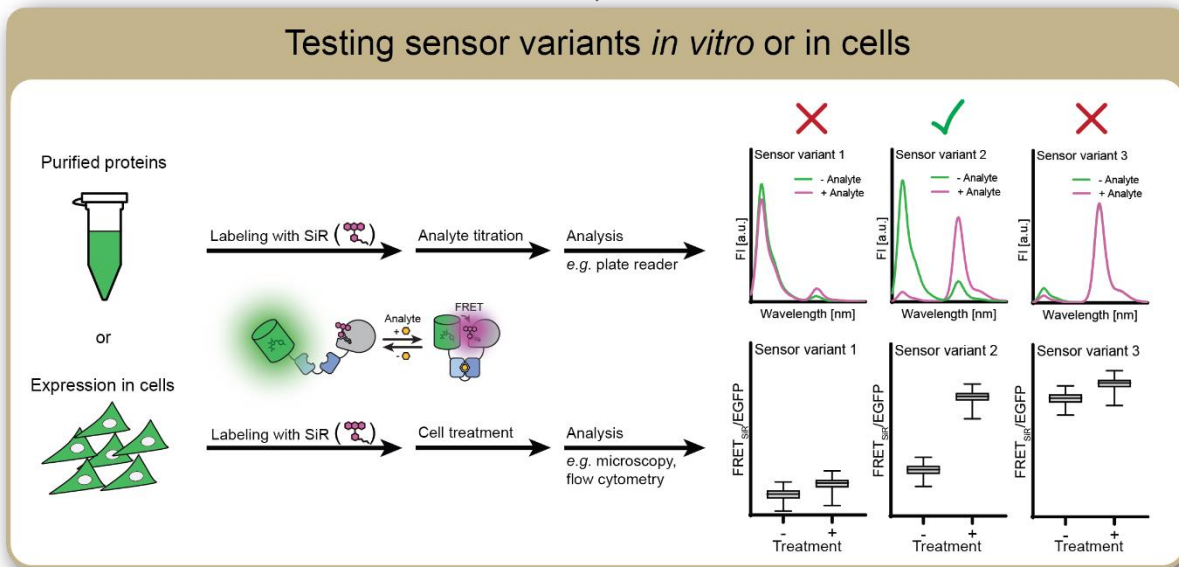

**Supplementary Figure 11| Development of ChemoG biosensors.**  
See **Supplementary Note 1** for explanations.

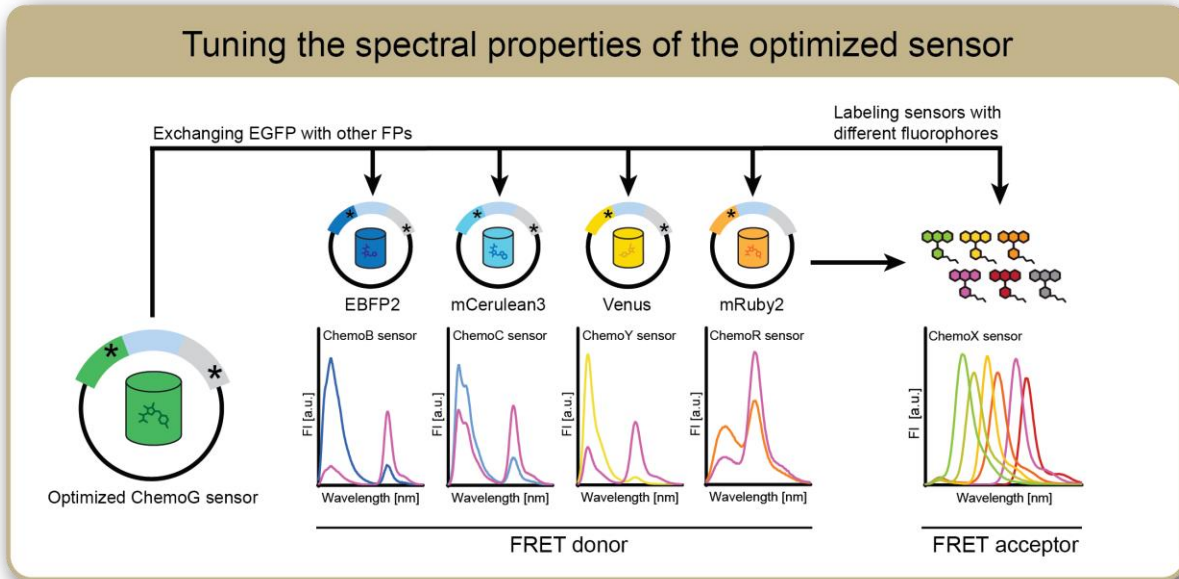

**Supplementary Figure 12| Tuning the spectral properties of the optimized ChemoG sensor.**  
See **Supplementary Note 2** for explanations.

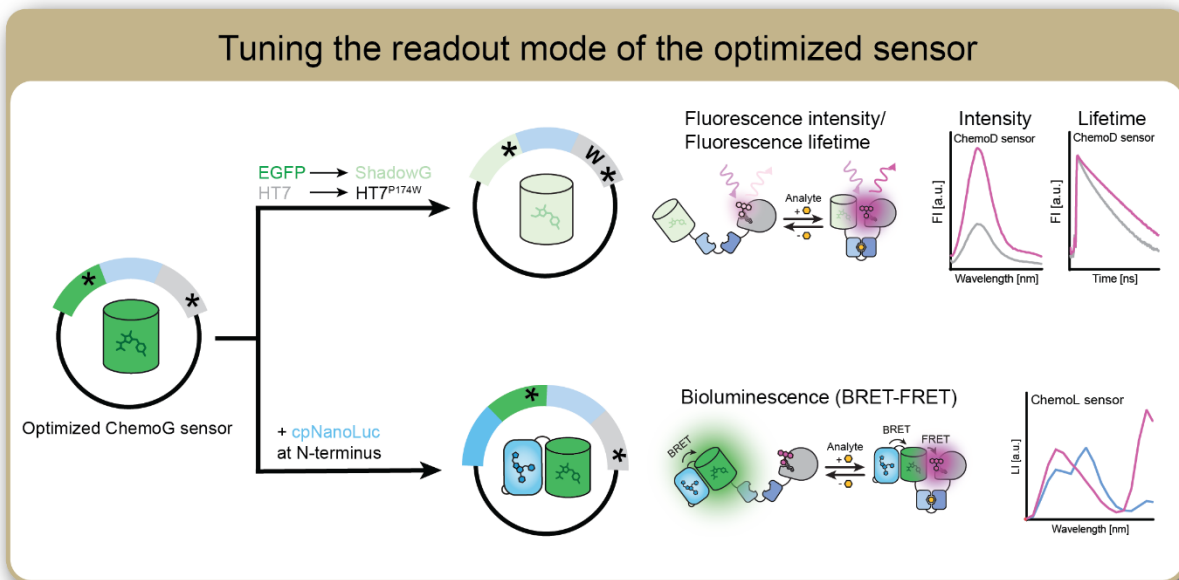

**Supplementary Figure 13| Tuning the readout mode of the optimized ChemoG sensor.**  
See **Supplementary Note 3** for explanations.

## Supplementary Tables

**Supplementary Table 1| FRET efficiencies of the ChemoG interface variants.**

| Construct | Interface mutations |                   | FRET ratio | FRET efficiency [%] |
|-----------|---------------------|-------------------|------------|---------------------|
|           | EGFP                | HaloTag7          |            |                     |
| ChemoG1   | -                   | -                 | 2.2 ±0.1   | 74.8 ±0.4           |
| ChemoG2   | A206K               | -                 | 4.0 ±0.1   | 84.1 ±0.6           |
| ChemoG3   | A206K               | L271E             | 8.9 ±0.1   | 90.9 ±0.1           |
| ChemoG4   | A206K               | L271E-E143R-E147R | 11.6 ±0.3  | 93.2 ±0.1           |
| ChemoG5   | A206K-T225R         | L271E-E143R-E147R | 20.3 ±0.8  | 95.8 ±0.1           |

FRET ratios (FRET/EGFP) and FRET efficiencies were determined for purified constructs labeled with SiR. Shown are the means ±s.d. (n = 3 technical replicates).



**Supplementary Table 2| FRET ratios of ChemoX constructs expressed in U-2 OS cells.**

| Construct | Subcellular localization | Localization tag    | FRET ratio | Number of cells |
|-----------|--------------------------|---------------------|------------|-----------------|
| HT7-EGFP  | -                        | -                   | 0.1 ±0.05  | 9               |
| ChemoG1   | -                        | -                   | 3.7 ±0.3   | 18              |
| ChemoG2   | -                        | -                   | 5.7 ±1.1   | 15              |
| ChemoG3   | -                        | -                   | 8.7 ±1.4   | 20              |
| ChemoG4   | -                        | -                   | 13.6 ±2.2  | 29              |
| ChemoG5   | -                        | -                   | 16.4 ±2.7  | 32              |
| ChemoG5   | Cytosol                  | NES                 | 21.5 ±5.3  | 60              |
| ChemoG5   | Outer plasma membrane    | PDGFR <sub>tm</sub> | 26.5 ±8.7  | 59              |
| ChemoG5   | Nucleus                  | NLS                 | 17.8 ±3.4  | 51              |
| ChemoG5   | Mitochondria             | Cox8                | 16.3 ±7.0  | 126             |
| ChemoG5   | Nuclear envelope         | Lamin B1            | 15.9 ±6.5  | 29              |
| ChemoB    | -                        | -                   | 14.6 ±3.0  | 20              |
| ChemoC    | -                        | -                   | 14.5 ±2.6  | 18              |
| ChemoY    | -                        | -                   | 17.5 ±5.6  | 24              |
| ChemoR    | -                        | -                   | 14.2 ±2.5  | 27              |

FRET ratios (FRET/FP) were determined for each construct expressed in U-2 OS cells labeled with SiR. Shown are the means ±s.d.

**Supplementary Table 3| FRET efficiencies of ChemoG5 labeled with different rhodamine fluorophores.**

| Construct | Fluorophore       | Max emission [nm] | FRET ratio | FRET efficiency [%] |
|-----------|-------------------|-------------------|------------|---------------------|
| ChemoG5   | JF <sub>525</sub> | 556 nm            | 18.0 ±1.4  | 94.9 ±0.3           |
| ChemoG5   | TMR               | 580 nm            | 23.6 ±2.7  | 96.6 ±0.3           |
| ChemoG5   | 580CP             | 606 nm            | 23.8 ±2.6  | 96.1 ±0.5           |
| ChemoG5   | CPY               | 628 nm            | 15.8 ±1.3  | 94.9 ±0.4           |
| ChemoG5   | SiR               | 668 nm            | 20.2 ±0.8  | 95.6 ±0.1           |
| ChemoG5   | JF <sub>669</sub> | 686 nm            | 14.2 ±0.1  | 94.7 ±0.4           |

FRET/EGFP ratios and FRET efficiencies were determined for purified ChemoG5 labeled with different rhodamine fluorophores. Shown are the means ±s.d. (n = 3 technical replicates).

**Supplementary Table 4| FRET efficiencies of ChemoX FRET pairs.**

| Construct  | FP         | Interface mutations |                   | FRET ratio | FRET efficiency [%] |
|------------|------------|---------------------|-------------------|------------|---------------------|
|            |            | XFP                 | HaloTag7          |            |                     |
| ChemoB     | EBFP2      | N39Y-V206K-T225R    | L271E-E143R-E147R | 36.2 ±0.3  | 96.6 ±0.1           |
| ChemoC*    | mCerulean3 | T225R               | L271E-E143R-E147R | 22.3 ±0.7  | 94.6 ±0.3           |
| ChemoG5    | EGFP       | A206K-T225R         | L271E-E143R-E147R | 20.3 ±0.8  | 95.8 ±0.1           |
| ChemoY     | Venus      | A206K-T225R         | L271E-E143R-E147R | 22.4 ±1.9  | 96.6 ±0.1           |
| ChemoR     | mScarlet   | D201K               | -                 | 8.4 ±0.2   | 91.3 ±0.3           |
| ChemoRuby2 | mRuby2     | -                   | -                 | 15.0 ±0.1  | 91.7 ±0.2           |

FRET/FP ratios of purified ChemoX constructs were determined upon labeling with SiR. Shown are the means ±s.d. (n = 3 technical replicates). \*mCerulean3 contains already K206, thus additional mutation at this position was not needed.

**Supplementary Table 5| Summarizing characteristics of the calcium sensors.**

| Construct      | FP         | # of mut. | Interface mutations |                   | C50    | Max $\Delta R/R_0$ | Hill slope |
|----------------|------------|-----------|---------------------|-------------------|--------|--------------------|------------|
|                |            |           | XFP                 | HaloTag7          |        |                    |            |
| 1              | EGFP       | 0         | -                   | -                 | 189 nM | 22.8 $\pm$ 0.3     | 2.2        |
| 2              | EGFP       | 1         | A206K               | -                 | 203 nM | 33.3 $\pm$ 0.8     | 1.8        |
| 3 (ChemoG-CaM) | EGFP       | 2         | A206K               | L271E             | 179 nM | 36.1 $\pm$ 1.0     | 2.2        |
| 4              | EGFP       | 3         | A206K               | L271E-E143R-E147R | 121 nM | 5.2 $\pm$ 0.2      | 1.5        |
| 5              | EGFP       | 4         | A206K-T225R         | L271E-E143R-E147R | 207 nM | 0.8 $\pm$ 0.1      | 1.1        |
| ChemoB-CaM     | EBFP2      | 2         | N39Y-V206K          | -                 | 206 nM | 12.7 $\pm$ 0.2     | 1.8        |
| ChemoC-CaM     | mCerulean3 | 1         | A206K               | -                 | 158 nM | 2.3 $\pm$ 0.1      | 3.2        |
| ChemoY-CaM     | Venus      | 1         | A206K               | -                 | 226 nM | 21.7 $\pm$ 0.6     | 2.0        |
| ChemoR-CaM0.1  | mScarlet   | 1         | -                   | -                 | n.d.   | 2.6 $\pm$ 0.1      | n.d.       |
| ChemoR-CaM     | mRuby2     | 0         | -                   | -                 | 202 nM | 3.4 $\pm$ 0.1      | 2.7        |
| ChemoR-CaM0.2  | mRuby3     | 0         | -                   | -                 | n.d.   | 2.5 $\pm$ 0.1      | n.d.       |
| ChemoR-CaM0.3  | mCherry    | 0         | -                   | -                 | n.d.   | 2.1 $\pm$ 0.1      | n.d.       |
| ChemoR-CaM0.4  | mKO2       | 0         | -                   | -                 | n.d.   | 1.9 $\pm$ 0.1      | n.d.       |
| ChemoR-CaM0.4  | TagRFP     | 0         | -                   | -                 | n.d.   | 2.0 $\pm$ 0.1      | n.d.       |
| YC 3.6         | ECFP/Venus | -         | -                   | -                 | 243 nM | 5.7 $\pm$ 0.1      | 1.6        |

Maximum FRET/FP ratio changes ( $^{Max}\Delta R/R_0$ ), C50 and Hill slope were determined for purified constructs. ChemoX-based calcium sensors were labeled with SiR. Values are based on titrations performed at 37 °C. Shown are the means and for  $\Delta R/R_0$  also the standard deviations (n = 3-4 technical replicates).

**Supplementary Table 6| Summarizing characteristics of ChemoG-CaM labeled with different FRET acceptors.**

| Construct  | Fluorophore       | Max emission [nm] | C50    | Max $\Delta R/R_0$ | Hill slope |
|------------|-------------------|-------------------|--------|--------------------|------------|
| ChemoG-CaM | TMR               | 580 nm            | 66 nM  | 3.9 $\pm$ 0.1      | 1.4        |
| ChemoG-CaM | JF <sub>585</sub> | 610 nm            | 100 nM | 10.5 $\pm$ 0.4     | 1.5        |
| ChemoG-CaM | CPY               | 628 nm            | 76 nM  | 8.6.0 $\pm$ 0.1    | 2.2        |
| ChemoG-CaM | JF <sub>635</sub> | 656 nm            | 114 nM | 24.4 $\pm$ 0.3     | 2.5        |
| ChemoG-CaM | SiR               | 668 nm            | 179 nM | 36.8 $\pm$ 0.2     | 2.2        |

Maximum FRET/EGFP ratio changes ( $^{Max}\Delta R/R_0$ ), C50 and Hill slope were determined for purified ChemoG-CaM labeled with different fluorophores. Values are based on titrations performed at 37 °C. Shown are the mean and for  $\Delta R/R_0$  also the standard deviations (n = 3 technical replicates).

**Supplementary Table 7 | Summarizing characteristics of ATP sensors.**

| Construct       | FP             | Interface mutations |          | C50    | Max $\Delta R/R_0$ | Hill slope |
|-----------------|----------------|---------------------|----------|--------|--------------------|------------|
|                 |                | XFP                 | HaloTag7 |        |                    |            |
| 1               | EGFP           | A206K               | -        | N.D    | 9.9 $\pm$ 0.1      | N.D        |
| 2a (ChemoG-ATP) | EGFP           | A206K               | L271E    | 2.3 mM | 12.1 $\pm$ 0.4     | 1.4        |
| 2b              | EGFP           | A206K-T225R         | -        | N.D.   | 6.0 $\pm$ 0.1      | N.D        |
| 3               | EGFP           | A206K-T225R         | L271E    | N.D.   | 1.9 $\pm$ 0.0      | N.D        |
| ChemoB-ATP      | EBFP2          | N39Y-V206K          | L271E    | 2.8 mM | 5.0 $\pm$ 0.1      | 1.6        |
| ChemoR-ATP      | mRuby2         | -                   | -        | 3.2 mM | 0.8 $\pm$ 0.1      | 2.0        |
| ATeam 1.03      | mseCFP/cpVenus | -                   | -        | 1.8 mM | 1.4 $\pm$ 0.1      | 1.8        |

Maximum FRET/FP ratio changes ( $^{Max}\Delta R/R_0$ ), C50 and Hill slope were determined for purified constructs. ChemoX-based ATP sensors were labeled with SiR. Values are based on titrations performed at 37 °C. Shown are the mean and for  $\Delta R/R_0$  also the standard deviations (n = 3 technical replicates).

**Supplementary Table 8 | Summarizing characteristics of NAD<sup>+</sup> sensors.**

| Construct      | FP     | Affinity mutation<br>ttLigA | Interface mutations |                        | Fluo              | C50         | Max $\Delta R/R_0$ | Hill<br>slope |
|----------------|--------|-----------------------------|---------------------|------------------------|-------------------|-------------|--------------------|---------------|
|                |        |                             | XFP                 | HaloTag7               |                   |             |                    |               |
| 1              | EGFP   | -                           | A206K               | -                      | TMR               | 38 $\mu$ M  | 10.1 $\pm$ 0.1     | 1.6           |
| 2              | EGFP   | V292A                       | A206K               | -                      | TMR               | 75 $\mu$ M  | 6.2 $\pm$ 0.1      | 1.2           |
| 3              | EGFP   | Y226W                       | A206K               | -                      | TMR               | 129 $\mu$ M | 6.3 $\pm$ 0.1      | 1.2           |
| 4              | EGFP   | Y226W-V292A                 | A206K               | -                      | SiR               | 205 $\mu$ M | 2.0 $\pm$ 0.1      | 0.9           |
| 5              | EGFP   | Y226W-V292A                 | A206K-T225R         | -                      | SiR               | 167 $\mu$ M | 18.1 $\pm$ 0.3     | 1.0           |
| 6 (ChemoG-NAD) | EGFP   | Y226W-V292A                 | A206K-T225R         | L271E                  | SiR               | 200 $\mu$ M | 34.7 $\pm$ 0.4     | 0.8           |
| ChemoG-NAD     | EGFP   | Y226W-V292A                 | A206K-T225R         | L271E                  | TMR               | 136 $\mu$ M | 7.5 $\pm$ 0.1      | 1.0           |
| ChemoG-NAD     | EGFP   | Y226W-V292A                 | A206K-T225R         | L271E                  | JF <sub>685</sub> | 36 $\mu$ M  | 18.5 $\pm$ 0.1     | 0.9           |
| ChemoG-NAD     | EGFP   | Y226W-V292A                 | A206K-T225R         | L271E                  | CPY               | 117 $\mu$ M | 20.4 $\pm$ 0.1     | 0.8           |
| ChemoG-NAD     | EGFP   | Y226W-V292A                 | A206K-T225R         | L271E                  | JF <sub>635</sub> | 52 $\mu$ M  | 22.5 $\pm$ 0.1     | 0.9           |
| 7              | EGFP   | Y226W-V292A                 | A206K-T225R         | L271E- E143R-<br>E147R | SiR               | 25 $\mu$ M  | 32.5 $\pm$ 0.3     | 0.8           |
| ChemoB-NAD     | EBFP2  | Y226W-V292A                 | N39Y-A206K-T225R    | L271E                  | SiR               | 103 $\mu$ M | 11.2 $\pm$ 0.1     | 0.9           |
| ChemoR-NAD     | mRuby2 | Y226W*                      | -                   | -                      | SiR               | 78 $\mu$ M  | 3.0 $\pm$ 0.1      | 1.0           |

Maximum FRET/FP ratio changes ( $^{Max}\Delta R/R_0$ ), C50 and Hill slope were determined for purified constructs labeled with indicated fluorophore substrates. Values are based on titrations performed at 37 °C. Shown are the mean and for  $\Delta R/R_0$  also the standard deviations (n = 3 technical replicates).

**Supplementary Table 9 | Summarizing characteristics of intensimetric NAD<sup>+</sup> sensors.**

| Construct  | Fluorophore       | Max emission [nm] | C50          | Max $\Delta F/F_0$ | Hill slope |
|------------|-------------------|-------------------|--------------|--------------------|------------|
| ChemoG-NAD | SiR               | 666 nm            | 21.0 $\mu$ M | 28.0 $\pm$ 1.9 %   | 0.89       |
| ChemoD-NAD | SiR               | 666 nm            | 32.7 $\mu$ M | 161.1 $\pm$ 5.0 %  | 0.84       |
| ChemoD-NAD | CPY               | 628 nm            | 36.8 $\mu$ M | 104.7 $\pm$ 1.2 %  | 0.83       |
| ChemoD-NAD | JF <sub>635</sub> | 662 nm            | 47.5 $\mu$ M | 226.6 $\pm$ 4.3 %  | 0.59       |

Maximum fluorescence intensity changes ( $^{Max}\Delta F/F_0$ ), C50 and Hill slopes were determined for purified constructs labeled with the indicated fluorophores. Values are based on titrations performed at 37 °C. Shown are the means and for  $\Delta F/F_0$  also the standard deviations (n = 3 technical replicates).



**Supplementary Table 10| Summarizing characteristics of fluorescence lifetime-based NAD<sup>+</sup> sensors.**

| Construct  | Fluorophore       | Max emission [nm] | C50          | Max $\Delta\tau$   | Hill slope |
|------------|-------------------|-------------------|--------------|--------------------|------------|
| ChemoG-NAD | SiR               | 666 nm            | 14.2 $\mu$ M | 0.53 $\pm$ 0.03 ns | 1.34       |
| ChemoD-NAD | SiR               | 666 nm            | 22.4 $\mu$ M | 1.16 $\pm$ 0.01 ns | 0.99       |
| ChemoD-NAD | CPY               | 628 nm            | 44.6 $\mu$ M | 1.18 $\pm$ 0.01 ns | 0.91       |
| ChemoD-NAD | JF <sub>635</sub> | 662 nm            | 32.3 $\mu$ M | 0.77 $\pm$ 0.01 ns | 0.68       |

Maximum intensity-weighted average fluorescence lifetime changes (Max $\Delta\tau$ ), C50 and Hill slopes were determined for purified constructs labeled with the indicated fluorophores. Values are based on titrations performed at 37 °C. Shown are the means and for Max $\Delta\tau$  also the standard deviations (n = 3 technical replicates).

**Supplementary Table 11| ChemoG FRET pairs recommended for the development of ChemoG FRET biosensors.**

| Construct | Interface mutations |                   | Addgene# |
|-----------|---------------------|-------------------|----------|
|           | EGFP                | HaloTag7          |          |
| ChemoG1   | -                   | -                 | 193799   |
| ChemoG2   | A206K               | -                 | 193800   |
| ChemoG3   | A206K               | L271E             | 193801   |
| ChemoG3.1 | A206K-T225R         | -                 | 193802   |
| ChemoG3.2 | A206K-T225R         | L271E             | 193803   |
| ChemoG5   | A206K-T225R         | L271E-E143R-E147R | 193805   |

**Supplementary Table 12| Chemicals and reagents used in this study.**

| Chemical/Reagent                                                                   | Manufacturer      | Catalogue number                         |
|------------------------------------------------------------------------------------|-------------------|------------------------------------------|
| KOD Hot Start Master Mix                                                           | Sigma-Aldrich     | 71842                                    |
| Q5® Site-Directed Mutagenesis Kit                                                  | NEB               | E0554S                                   |
| QIAprep Spin Miniprep Kit                                                          | Qiagen            | 27106                                    |
| GeneJET Endo-Free Plasmid-Maxiprep-Kit                                             | ThermoFisher      | K0861                                    |
| Isopropyl-β-D-thiogalactopyranoside (IPTG)                                         | Roth              | CN084                                    |
| Phenylmethylsulfonyl fluoride (PMSF)                                               | ThermoScientific  | 36978                                    |
| Lysozyme                                                                           | ThermoScientific  | 89833                                    |
| HisPur™ Ni-NTA Superflow Agarose                                                   | ThermoScientific  | 25217                                    |
| 4-20% Mini Protean TGX stain-free gel                                              | Bio-Rad           | 568094                                   |
| Amicon® Ultra 4 mL Centrifugal Filters                                             | Merck             | UFC803024 (30 kDa)<br>UFC805024 (50 kDa) |
| Glycerol                                                                           | Merck             | 356350                                   |
| Bovine serum albumin (BSA)                                                         | Roth              | 01634                                    |
| 4-(2-hydroxyethyl)-1-piperazineethanesulfonic acid (HEPES)                         | Sigma-Aldrich     | H4034                                    |
| Sodium chloride (NaCl)                                                             | Merck             | 106404                                   |
| Dimethyl sulfoxide (DMSO)                                                          | Applichem         | A36720100                                |
| Calcium chloride                                                                   | Roth              | A1191                                    |
| ethylene glycol-bis(β-aminoethyl ether)- <i>N,N,N',N'</i> -tetraacetic acid (EGTA) | Sigma-Aldrich     | E4378                                    |
| Calcium Calibration buffer Kit #1                                                  | Life technologies | C3008MP                                  |
| SPG pH 4.0 - 1 M buffer                                                            | Jena Bioscience   | CSS-389                                  |
| SPG pH 10.0 - 1 M buffer                                                           | Jena Bioscience   | CSS-390                                  |
| Histamine                                                                          | Sigma-Aldrich     | H7250                                    |
| Ionomycin                                                                          | Sigma-Aldrich     | I9657                                    |
| cOmplete™ Protease inhibitor cocktail                                              | Roche             | 11836153001                              |
| CelLytic™ M                                                                        | Sigma-Aldrich     | C2978                                    |
| Cal520-AM                                                                          | Abcam             | ab171868                                 |
| Digitonin 5%                                                                       | ThermoScientific  | BN2006                                   |
| 1x PBS pH 7.4                                                                      | Gibco             | 10010015                                 |
| 1x HBSS with calcium and magnesium                                                 | Corning           | 21-023-CMR                               |
| TrypLE™ Express                                                                    | Gibco             | 12604013                                 |
| DMEM high glucose +GlutaMAX™                                                       | Gibco             | 31966021                                 |
| DMEM high glucose, phenol red-free                                                 | Gibco             | 31053028                                 |
| DMEM no glucose, phenol red-free                                                   | Gibco             | A1443001                                 |
| Sodium pyruvate (100X)                                                             | Gibco             | 11360070                                 |
| GlutaMAX™ Supplement (100x)                                                        | Gibco             | 35050038                                 |
| Fetal bovine serum (FBS, heat-inactivated)                                         | Gibco             | 10500064                                 |
| Opti-MEM™, reduced serum                                                           | Gibco             | 31985047                                 |
| Lipofectamine 3000 Transfection Reagent                                            | Invitrogen        | L3000001                                 |
| Adenosine-5'-triphosphate (ATP) magnesium salt                                     | Sigma-Aldrich     | A9187                                    |
| Adenosine-5'-diphosphate (ADP) disodium salt                                       | Sigma-Aldrich     | 1897                                     |
| Adenosine-5'-monophosphate (AMP) sodium salt                                       | Sigma-Aldrich     | A1752                                    |
| Guanosine-5'-triphosphate (GTP) sodium salt                                        | Sigma-Aldrich     | 10106399001                              |
| 2-Deoxy-D-glucose (2DG)                                                            | TCI Chemicals     | D0051                                    |
| D-glucose monohydrate                                                              | Roth              | 6780                                     |
| Nicotinamide (NAM)                                                                 | Sigma-Aldrich     | 72340                                    |
| Nicotinamide riboside (NR)                                                         | Combi-Blocks      | HB-5832                                  |
| Nicotinamide mononucleotide (NMN)                                                  | Sigma-Aldrich     | N3501                                    |
| Nicotinamide adenine dinucleotide (NAD+)                                           | Roche             | 10127965001                              |
| Nicotinamide adenine dinucleotide phosphate (NADP+)                                | Roth              | AE13.3                                   |

|                                                                      |               |            |
|----------------------------------------------------------------------|---------------|------------|
| Nicotinamide adenine nucleotide, reduced (NADH)                      | Roth          | AE12.2     |
| Nicotinic acid adenine dinucleotide (NAAD+)                          | Sigma-Aldrich | N4256      |
| FK866                                                                | Selleckchem   | S2799      |
| <i>N</i> -methyl- <i>N</i> -nitro- <i>N</i> -nitrosoguanidine (MNNG) | Biozol        | N529925    |
| MitoTracker™ Red FM                                                  | Invitrogen    | M22425     |
| Hoechst 33342                                                        | Invitrogen    | H3570      |
| Penicillin-Streptomycin (Pen/Strep)                                  | Gibco         | 15140122   |
| NanoBRET™ Nano-Glo Substrate                                         | Promega       | N157C      |
| Extracellular NanoLuc® Inhibitor                                     | Promega       | N235A      |
| Nano-Glo™ Substrate                                                  | Promega       | N113B      |
| DL-2-Amino-5-phosphonovaleric acid (APV)                             | SantaCruz     | sc-201503  |
| NBQX disodium salt                                                   | Sigma-Aldrich | N183       |
| Black non-binding flat bottom 96 well plates                         | Perkin Elmer  | 6005720    |
| Black low volume flat bottom 384 well plates                         | Corning       | 3820       |
| White non-binding flat bottom 96 well plates                         | Perkin Elmer  | 6005290    |
| White 96 well plate, cell culture treated                            | BrandTech     | 782090     |
| White low volume flat bottom 384 well plates                         | Corning       | 3824       |
| Black 96 well glass bottom imaging plate                             | IBL, Cellvis  | P96-1.5H-N |
| Black 24 well glass bottom imaging plate                             | IBL, Cellvis  | P24-1.5H-N |

**Supplementary Table 13| Fluorophores used in this study.**

| Number | Structure                                                                           | Name                  | Ex <sub>max</sub> /Em <sub>max</sub> [nm] | Source, reference                                                           |
|--------|-------------------------------------------------------------------------------------|-----------------------|-------------------------------------------|-----------------------------------------------------------------------------|
| 1      | 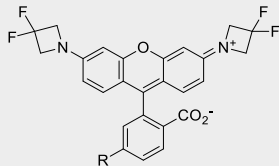   | JF <sub>525</sub> -CA | 525/549                                   | Gift from Dr. Luke Lavis, HHMI, Ashburn, VA, USA <sup>1</sup>               |
| 2      |    | TMR-CA                | 548/572                                   | Purchased from Promega, Madison, WI, USA <sup>2</sup>                       |
| 3      |    | 580CP-CA              | 582/607                                   | Gift from Dr. Alexey N. Butkevich, MPI-MF, Heidelberg, Germany <sup>3</sup> |
| 4      |    | JF <sub>585</sub> -CA | 585/609                                   | Gift from Dr. Luke Lavis, HHMI, Ashburn, VA, USA <sup>1</sup>               |
| 5      |   | CPY-CA                | 606/626                                   | Butkevich <i>et al.</i> <sup>4</sup>                                        |
| 6      |  | JF <sub>635</sub> -CA | 635/652                                   | Gift from Dr. Luke Lavis, HHMI, Ashburn, VA, USA <sup>1</sup>               |
| 7      |  | SiR-halo<br>(=SiR-CA) | 643/662                                   | Lukinavicius <i>et al.</i> <sup>5</sup>                                     |
| 8      |  | JF <sub>669</sub> -CA | 669/682                                   | Gift from Dr. Luke Lavis, HHMI, Ashburn, VA, USA <sup>1</sup>               |
| 9      |  | Cy3-CA                | 554/568                                   | Wilhelm and Kuehn <i>et al.</i> <sup>6</sup>                                |

10

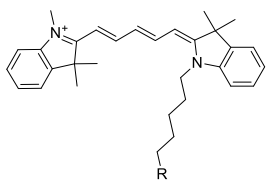

Cy5-CA

649/666

Wilhelm and Kuehn *et al.*<sup>6</sup>

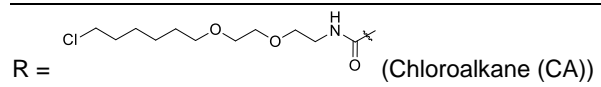

JF = Janelia Fluor

**Supplementary Table 14| Plasmids and stable cell lines used in this study.**

| Construct                                                                                 | Plasmid    | Gene                                                                           | Entry plasmids (Addgene#)                     | Addgene# | Stable cell line |
|-------------------------------------------------------------------------------------------|------------|--------------------------------------------------------------------------------|-----------------------------------------------|----------|------------------|
| pET-51b(+) HaloTag7-EGFP                                                                  | pET-51b(+) | HaloTag7-EGFP                                                                  | 167266 <sup>6</sup> ,<br>130706 <sup>7</sup>  | n.a.     | n.a.             |
| pET-51b(+) ChemoG1                                                                        | pET-51b(+) | ChemoG1                                                                        | 167266 <sup>6</sup> ,<br>130706 <sup>7</sup>  | 193799   | n.a.             |
| pET-51b(+) ChemoG1 <sup>Y39A</sup>                                                        | pET-51b(+) | ChemoG1 <sup>Y39A</sup>                                                        | ChemoG1                                       | n.a.     | n.a.             |
| pET-51b(+) ChemoG1 <sup>K41A</sup>                                                        | pET-51b(+) | ChemoG1 <sup>K41A</sup>                                                        | ChemoG1                                       | n.a.     | n.a.             |
| pET-51b(+) ChemoG1 <sup>F223R</sup>                                                       | pET-51b(+) | ChemoG1 <sup>F223R</sup>                                                       | ChemoG1                                       | n.a.     | n.a.             |
| pET-51b(+) ChemoG2                                                                        | pET-51b(+) | ChemoG2                                                                        | ChemoG1                                       | 193800   | n.a.             |
| pET-51b(+) ChemoG3                                                                        | pET-51b(+) | ChemoG3                                                                        | ChemoG2                                       | 193801   | n.a.             |
| pET-51b(+) ChemoG3.1                                                                      | pET-51b(+) | ChemoG3                                                                        | ChemoG2                                       | 193802   | n.a.             |
| pET-51b(+) ChemoG3.2                                                                      | pET-51b(+) | ChemoG3                                                                        | ChemoG2                                       | 193803   | n.a.             |
| pET-51b(+) ChemoG4                                                                        | pET-51b(+) | ChemoG4                                                                        | ChemoG3                                       | 193804   | n.a.             |
| pET-51b(+) ChemoG5                                                                        | pET-51b(+) | ChemoG5                                                                        | ChemoG4                                       | 193805   | n.a.             |
| pET-51b(+) ChemoB                                                                         | pET-51b(+) | ChemoB                                                                         | 54572 <sup>8</sup>                            | n.a.     | n.a.             |
| pET-51b(+) ChemoC                                                                         | pET-51b(+) | ChemoC                                                                         | 48203 <sup>9</sup>                            | n.a.     | n.a.             |
| pET-51b(+) ChemoY                                                                         | pET-51b(+) | ChemoY                                                                         | 39813 <sup>10</sup>                           | n.a.     | n.a.             |
| pET-51b(+) ChemoR                                                                         | pET-51b(+) | ChemoR                                                                         | 85042 <sup>11</sup>                           | n.a.     | n.a.             |
| pCDNA5/FRT-ChemoG1                                                                        | pCDNA5/FRT | ChemoG1                                                                        | 167266 <sup>6</sup> ,<br>130706 <sup>7</sup>  | 193806   | n.a.             |
| pCDNA5/FRT-ChemoG2                                                                        | pCDNA5/FRT | ChemoG2                                                                        | ChemoG1                                       | n.a.     | n.a.             |
| pCDNA5/FRT-ChemoG3                                                                        | pCDNA5/FRT | ChemoG3                                                                        | ChemoG2                                       | n.a.     | n.a.             |
| pCDNA5/FRT-ChemoG4                                                                        | pCDNA5/FRT | ChemoG4                                                                        | ChemoG3                                       | n.a.     | n.a.             |
| pCDNA5/FRT-ChemoG5                                                                        | pCDNA5/FRT | ChemoG5                                                                        | ChemoG4                                       | 193807   | n.a.             |
| pCDNA5/FRT-ChemoB                                                                         | pCDNA5/FRT | ChemoB                                                                         | 54572 <sup>8</sup>                            | 193808   | n.a.             |
| pCDNA5/FRT-ChemoC                                                                         | pCDNA5/FRT | ChemoC                                                                         | 48203 <sup>9</sup>                            | 193809   | n.a.             |
| pCDNA5/FRT-ChemoY                                                                         | pCDNA5/FRT | ChemoY                                                                         | 39813 <sup>10</sup>                           | 193810   | n.a.             |
| pCDNA5/FRT-ChemoR                                                                         | pCDNA5/FRT | ChemoR                                                                         | 85042 <sup>11</sup>                           | 193811   | n.a.             |
| pCDNA5/FRT-NES-ChemoG5                                                                    | pCDNA5/FRT | NES-ChemoG5                                                                    | ChemoG5                                       | n.a.     | n.a.             |
| pCDNA5/FRT-ChemoG5-PDGFR <sub>tm</sub>                                                    | pCDNA5/FRT | ChemoG5-PDGFR <sub>tm</sub>                                                    | ChemoG5,<br>in-house<br>plasmid <sup>12</sup> | n.a.     | n.a.             |
| pCDNA5/FRT-ChemoG5-NLS3x                                                                  | pCDNA5/FRT | ChemoG5-NLS3x                                                                  | ChemoG5                                       | n.a.     | n.a.             |
| pCDNA5/FRT-[2xCox8]-ChemoG5                                                               | pCDNA5/FRT | [2xCox8]-ChemoG5                                                               | ChemoG5,<br>113916 <sup>13</sup>              | n.a.     | n.a.             |
| pCDNA5/FRT-ChemoG5-LaminB1                                                                | pCDNA5/FRT | ChemoG5-LaminB1                                                                | 55069                                         | n.a.     | n.a.             |
| pET-51b(+) EGFP-CaM-P30-M13-HaloTag7                                                      | pET-51b(+) | EGFP-CaM-P30-M13-HaloTag7                                                      | 40755 <sup>14</sup>                           | n.a.     | n.a.             |
| pET-51b(+) EGFP <sup>A206K</sup> -CaM-P30-M13-HaloTag7                                    | pET-51b(+) | EGFP <sup>A206K</sup> -CaM-P30-M13-HaloTag7                                    | 40755 <sup>14</sup>                           | n.a.     | n.a.             |
| pET-51b(+) ChemoG-CaM                                                                     | pET-51b(+) | ChemoG-CaM                                                                     | 40755 <sup>14</sup>                           | n.a.     | n.a.             |
| pET-51b(+) EGFP <sup>A206K</sup> -CaM-P30-M13-HaloTag7 <sup>E143R-E147R-L271E</sup>       | pET-51b(+) | EGFP <sup>A206K</sup> -CaM-P30-M13-HaloTag7 <sup>E143R-E147R-L271E</sup>       | 40755 <sup>14</sup>                           | n.a.     | n.a.             |
| pET-51b(+) EGFP <sup>A206K-T225R</sup> -CaM-P30-M13-HaloTag7 <sup>E143R-E147R-L271E</sup> | pET-51b(+) | EGFP <sup>A206K-T225R</sup> -CaM-P30-M13-HaloTag7 <sup>E143R-E147R-L271E</sup> | 40755 <sup>14</sup>                           | n.a.     | n.a.             |
| pET-51b(+) ChemoB-CaM                                                                     | pET-51b(+) | ChemoB-CaM                                                                     | 40755 <sup>14</sup>                           | 193812   | n.a.             |
| pET-51b(+) ChemoC-CaM                                                                     | pET-51b(+) | ChemoC-CaM                                                                     | 40755 <sup>14</sup>                           | 193813   | n.a.             |
| pET-51b(+) ChemoY-CaM                                                                     | pET-51b(+) | ChemoY-CaM                                                                     | 40755 <sup>14</sup>                           | 193814   | n.a.             |

|                                                                        |                                                                                                          |               |                                                                                                          |                      |                     |                      |
|------------------------------------------------------------------------|----------------------------------------------------------------------------------------------------------|---------------|----------------------------------------------------------------------------------------------------------|----------------------|---------------------|----------------------|
| pET-51b(+)                                                             | ChemoR-CaM                                                                                               | pET-51b(+)    | ChemoR-CaM                                                                                               | 40755 <sup>14</sup>  | 193815              | n.a.                 |
| pET-51b(+)                                                             | YC 3.6                                                                                                   | pET-51b(+)    | YC 3.6                                                                                                   | 51966 <sup>15</sup>  | n.a.                | n.a.                 |
| pCDNA5/FRT-ChemoG-CaM                                                  |                                                                                                          | pCDNA5/FRT    | ChemoG-CaM                                                                                               | 40755 <sup>14</sup>  | 193816              | n.a.                 |
| pGP-AAV2-hSyn1-NES-ChemoG-CaM                                          |                                                                                                          | pGP-AAV2      | NES-ChemoG-CaM                                                                                           | 101061 <sup>16</sup> | 193817              | n.a.                 |
| pET-51b(+)                                                             | EGFP <sup>A206K</sup> -F <sub>0</sub> F <sub>1</sub> -HT7                                                | pET-51b(+)    | EGFP <sup>A206K</sup> -F <sub>0</sub> F <sub>1</sub> -HT7                                                | 51958 <sup>17</sup>  | n.a.                | n.a.                 |
| pET-51b(+)                                                             | ChemoG-ATP                                                                                               | pET-51b(+)    | ChemoG-ATP                                                                                               | 51958 <sup>17</sup>  | n.a.                | U-2 OS Flip-In T-REx |
| pET-51b(+)                                                             | EGFP <sup>A206K-T225R</sup> -F <sub>0</sub> F <sub>1</sub> -HT7                                          | pET-51b(+)    | EGFP <sup>A206K-T225R</sup> -F <sub>0</sub> F <sub>1</sub> -HT7                                          | 51958 <sup>17</sup>  | n.a.                | n.a.                 |
| pET-51b(+)                                                             | EGFP <sup>A206K-T225R</sup> -F <sub>0</sub> F <sub>1</sub> -HT7 <sup>L271E</sup>                         | pET-51b(+)    | EGFP <sup>A206K-T225R</sup> -F <sub>0</sub> F <sub>1</sub> -HT7 <sup>L271E</sup>                         | 51958 <sup>17</sup>  | n.a.                | n.a.                 |
| pET-51b(+)                                                             | ChemoB-ATP                                                                                               | pET-51b(+)    | ChemoB-ATP                                                                                               | 51958 <sup>17</sup>  | n.a.                | n.a.                 |
| pET-51b(+)                                                             | ChemoR-ATP                                                                                               | pET-51b(+)    | ChemoR-ATP                                                                                               | 51958 <sup>17</sup>  | n.a.                | n.a.                 |
| pET-51b(+)                                                             | ATeam 1.03                                                                                               | pET-51b(+)    | ATeam 1.03                                                                                               | 51958 <sup>17</sup>  | n.a.                | n.a.                 |
| pCDNA5/FRT-ChemoG-ATP                                                  |                                                                                                          | pCDNA5/FRT    | ChemoG-ATP                                                                                               | 51958 <sup>17</sup>  | 193818              | n.a.                 |
| pCDNA5/FRT-ChemoB-ATP                                                  |                                                                                                          | pCDNA5/FRT    | ChemoB-ATP                                                                                               | 51958 <sup>17</sup>  | 193819              | n.a.                 |
| pCDNA5/FRT-ChemoR-ATP                                                  |                                                                                                          | pCDNA5/FRT    | ChemoR-ATP                                                                                               | 51958 <sup>17</sup>  | 193820              | n.a.                 |
| pCDNA5/FRT/TO-ATeam 1.03                                               |                                                                                                          | pCDNA5/FRT    | ATeam 1.03                                                                                               | 51958 <sup>17</sup>  | n.a.                | U-2 OS Flip-In T-REx |
| pET-51b(+)                                                             | EGFP <sup>A206K</sup> -ttLigA <sup>K118L-D289N</sup> -HT7                                                | pET-51b(+)    | EGFP <sup>A206K</sup> -ttLigA <sup>K118L-D289N</sup> -HT7                                                | -                    | n.a.                | n.a.                 |
| pET-51b(+)                                                             | EGFP <sup>A206K</sup> -ttLigA <sup>K118L-D289N-V292A</sup> -HT7                                          | pET-51b(+)    | EGFP <sup>A206K</sup> -ttLigA <sup>K118L-D289N-V292A</sup> -HT7                                          | -                    | n.a.                | n.a.                 |
| pET-51b(+)                                                             | EGFP <sup>A206K</sup> -ttLigA <sup>K118L-Y226W-D289N-V292A</sup> -HT7                                    | pET-51b(+)    | EGFP <sup>A206K</sup> -ttLigA <sup>K118L-Y226W-D289N-V292A</sup> -HT7                                    | -                    | n.a.                | n.a.                 |
| pET-51b(+)                                                             | EGFP <sup>A206K-T225R</sup> -ttLigA <sup>K118L-Y226W-D289N-V292A</sup> -HT7                              | pET-51b(+)    | EGFP <sup>A206K-T225R</sup> -ttLigA <sup>K118L-Y226W-D289N-V292A</sup> -HT7                              | -                    | n.a.                | n.a.                 |
| pET-51b(+)                                                             | ChemoG-NAD                                                                                               | pET-51b(+)    | ChemoG-NAD                                                                                               | -                    | n.a.                | n.a.                 |
| pET-51b(+)                                                             | EGFP <sup>A206K-T225R</sup> -ttLigA <sup>K118L-Y226W-D289N-V292A</sup> -HT7 <sup>E143R-E147R-L271E</sup> | pET-51b(+)    | EGFP <sup>A206K-T225R</sup> -ttLigA <sup>K118L-Y226W-D289N-V292A</sup> -HT7 <sup>E143R-E147R-L271E</sup> | -                    | n.a.                | n.a.                 |
| pET-51b(+)                                                             | ChemoB-NAD                                                                                               | pET-51b(+)    | ChemoB-NAD                                                                                               | -                    | n.a.                | n.a.                 |
| pET-51b(+)                                                             | ChemoR-NAD                                                                                               | pET-51b(+)    | ChemoR-NAD                                                                                               | -                    | n.a.                | n.a.                 |
| pCDNA5/FRT-ChemoG-NAD                                                  |                                                                                                          | pCDNA5/FRT    | ChemoG-NAD                                                                                               | -                    | 193821              | U-2 OS Flip-In T-REx |
| pCDNA5/FRT-ChemoG-NAD-NLS3x                                            |                                                                                                          | pCDNA5/FRT    | ChemoG-NAD-NLS3x                                                                                         | -                    | 193822              | U-2 OS Flip-In T-REx |
| pCDNA5/FRT/TO-[4xCox8]-ChemoG-NAD                                      |                                                                                                          | pCDNA5/FRT/TO | [4xCox8]-ChemoG-NAD                                                                                      | -                    | 193823              | U-2 OS Flip-In T-REx |
| pCDNA5/FRT-ChemoB-NAD                                                  |                                                                                                          | pCDNA5/FRT    | ChemoB-NAD                                                                                               | -                    | 193824              | U-2 OS Flip-In T-REx |
| pCDNA5/FRT-ChemoB-NAD-NLS3x                                            |                                                                                                          | pCDNA5/FRT    | ChemoB-NAD-NLS3x                                                                                         | -                    | n.a.                | n.a.                 |
| pCDNA5/FRT-ChemoR-NAD                                                  |                                                                                                          | pCDNA5/FRT    | ChemoR-NAD                                                                                               | -                    | 193825              | U-2 OS Flip-In T-REx |
| pCDNA5/FRT/TO-ChemoB-NAD[hsOpti]-NLS3x-T2A-[4xCox8]-ChemoG-NAD[zfOpti] |                                                                                                          | pCDNA5/FRT/TO | ChemoB-NAD[hsOpti]-NLS3x-T2A-[4xCox8]-ChemoG-NAD[zfOpti]                                                 | -                    | n.a.                | n.a.                 |
| pET-51b(+)                                                             | ChemoD-NAD                                                                                               | pET-51b(+)    | ChemoD-NAD                                                                                               | 104620 <sup>18</sup> | n.a.                | n.a.                 |
| pCDNA5/FRT-ChemoD-NAD                                                  |                                                                                                          | pCDNA5/FRT    | ChemoD-NAD                                                                                               | 104620 <sup>18</sup> | 193826              | U-2 OS Flip-In T-REx |
| pET-51b(+)                                                             | ChemoL-NAD                                                                                               | pET-51b(+)    | ChemoL-NAD                                                                                               | 117909 <sup>19</sup> | n.a.                | U-2 OS Flip-In T-REx |
| pET-51b(+)                                                             | ChemoL-CaM                                                                                               | pET-51b(+)    | ChemoL-CaM                                                                                               | 117909 <sup>19</sup> | n.a.                | n.a.                 |
| pET-51b(+)                                                             | ChemoL-ATP                                                                                               | pET-51b(+)    | ChemoL-ATP                                                                                               | 117909 <sup>19</sup> | n.a.                | n.a.                 |
| pCDNA5/FRT-ChemoL-NAD                                                  |                                                                                                          | pCDNA5/FRT    | ChemoL-NAD                                                                                               | 117909 <sup>19</sup> | 193827              | n.a.                 |
| pCDNA5/FRT-ChemoL-NAD-NLS3x                                            |                                                                                                          | pCDNA5/FRT    | ChemoL-NAD-NLS3x                                                                                         | 117909 <sup>19</sup> | 193828              | n.a.                 |
| pCDNA5/FRT-[4xCox8]-ChemoL-NAD                                         |                                                                                                          | pCDNA5/FRT    | [4xCox8]-ChemoL-NAD                                                                                      | 117909 <sup>19</sup> | 193829              | n.a.                 |
| pCDNA5/FRT-ChemoL-CaM                                                  |                                                                                                          | pCDNA5/FRT    | ChemoL-CaM                                                                                               | 117909 <sup>19</sup> | 193830              | n.a.                 |
| pCDNA5/FRT-ChemoL-ATP                                                  |                                                                                                          | pCDNA5/FRT    | ChemoL-ATP                                                                                               | 117909 <sup>19</sup> | 193831              | n.a.                 |
| pET-51b(+)                                                             | His-TEV-ChemoG1                                                                                          | pET-51b(+)    | ChemoG1                                                                                                  | 167266 <sup>6</sup>  | n.a.                | n.a.                 |
| pET-51b(+)                                                             | His-TEV-ChemoG5                                                                                          | pET-51b(+)    | ChemoG5                                                                                                  | 167266 <sup>6</sup>  | n.a.                | n.a.                 |
| pET-51b(+)                                                             | His-TEV-HaloTag7                                                                                         | pET-51b(+)    | HT7                                                                                                      |                      | 167266 <sup>6</sup> | n.a.                 |

n.a. = not available.



**Supplementary Table 15| Data collection and refinement statistics.**

|                                     | HaloTag7-Cy3<br>8B6R                | ChemoG1-TMR<br>8B6S | ChemoG5-TMR<br>8B6T     |
|-------------------------------------|-------------------------------------|---------------------|-------------------------|
| <b>Data collection</b>              |                                     |                     |                         |
| Space group                         | <i>P4<sub>2</sub>2<sub>1</sub>2</i> | <i>P1</i>           | <i>P12<sub>1</sub>1</i> |
| Unit-cell parameters                |                                     |                     |                         |
| <i>a</i> , <i>b</i> , <i>c</i> (Å)  | 112.56, 112.56, 44.33               | 46.19, 63.71, 89.42 | 46.60, 64.04, 172.95    |
| <i>α</i> , <i>β</i> , <i>γ</i> (°)  | 90.00, 90.00, 90.00                 | 93.56, 91.02, 90.85 | 90.00, 97.67, 90.00     |
| Radiation source                    | PXII-X10SA, SLS                     | PXII-X10SA, SLS     | PXII-X10SA, SLS         |
| Wavelength (Å)                      | 0.99988                             | 0.99996             | 0.99992                 |
| Temperature (K)                     | 100                                 | 100                 | 100                     |
| Resolution range (Å)                | 50-1.50 (1.60-1.50)                 | 50-1.80 (1.90-1.80) | 50-2.00 (2.10-2.00)     |
| No. of observed reflections         | 341056 (60343)                      | 182229 (26711)      | 216345 (30251)          |
| No. of unique reflections           | 46121 (7965)                        | 89852 (13310)       | 66470 (9089)            |
| Multiplicity                        | 7.4 (7.6)                           | 2.0 (2.0)           | 3.3 (3.3)               |
| Completeness (%)                    | 99.9 (99.9)                         | 95.3 (94.3)         | 97.0 (97.8)             |
| <i>R</i> <sub>merge</sub> (%)       | 6.8 (65.7)                          | 4.1 (40.0)          | 8.6 (41.0)              |
| <i>&lt;I/σ(I)&gt;</i>               | 18.2 (3.4)                          | 12.0 (2.1)          | 8.5 (3.4)               |
| CC <sub>1/2</sub> (%)#              | 99.9 (90.2)                         | 99.8 (75.2)         | 99.5 (87.4)             |
| <b>Refinement</b>                   |                                     |                     |                         |
| Molecules per a.u.                  | 1                                   | 2                   | 2                       |
| No. of reflections                  | 46120                               | 89842               | 66470                   |
| No. of reflections in test set      | 2306                                | 4492                | 3399                    |
| Resolution range (Å)                | 41.25-1.50                          | 46.18-1.80          | 46.18-2.00              |
| No. of non-hydrogen atoms           |                                     |                     |                         |
| Protein                             | 2365                                | 8273                | 8276                    |
| Ligand/ion                          | 72                                  | 146                 | 134                     |
| Water                               | 297                                 | 460                 | 308                     |
| Total                               | 2734                                | 8879                | 8718                    |
| <i>R</i> (%)                        | 16.20                               | 17.28               | 22.06                   |
| <i>R</i> <sub>free</sub> (%)        | 19.19                               | 20.08               | 24.51                   |
| RMS deviations from ideal           |                                     |                     |                         |
| bonds (Å)                           | 0.013                               | 0.007               | 0.002                   |
| angles (°)                          | 1.229                               | 1.094               | 0.779                   |
| <i>B</i> -factors (Å <sup>2</sup> ) |                                     |                     |                         |
| Protein                             | 14.80                               | 26.03               | 20.62                   |
| Ligand/ion                          | 23.87                               | 22.14               | 17.73                   |
| Water                               | 24.40                               | 29.14               | 19.67                   |
| Average                             | 16.08                               | 26.13               | 20.54                   |
| Wilson B (Å <sup>2</sup> )          | 14.42                               | 24.95               | 22.88                   |
| Ramachandran statistics (%)         |                                     |                     |                         |
| favored regions                     | 95.9                                | 97.5                | 96.8                    |
| allowed regions                     | 4.1                                 | 2.5                 | 3.2                     |
| disallowed regions                  | 0                                   | 0                   | 0                       |
| Clashscore                          | 1.04                                | 1.33                | 3.03                    |

#as implemented in XDS<sup>20</sup>. Values in parentheses are for the highest resolution shell.

**Supplementary Table 16| Spectral settings for fluorescence spectroscopy measurements.**

| Chromophore/fluorophore | Max. emission wavelength | Excitation wavelength used | Emission wavelength range measured |
|-------------------------|--------------------------|----------------------------|------------------------------------|
| EBFP2                   | 446 nm                   | 360 nm                     | 400-800 nm                         |
| mCerulean3              | 474 nm                   | 400 nm                     | 440-800 nm                         |
| EGFP                    | 510 nm                   | 440 nm                     | 480-800 nm                         |
| Venus                   | 528 nm                   | 460 nm                     | 494-800 nm                         |
| mKO2                    | 566 nm                   | 510 nm                     | 550-800 nm                         |
| TagRFP                  | 584 nm                   | 510 nm                     | 550-800 nm                         |
| mRuby2                  | 594 nm                   | 510 nm                     | 550-800 nm                         |
| mRuby3                  | 594 nm                   | 510 nm                     | 550-800 nm                         |
| mScarlet                | 594 nm                   | 520 nm                     | 560-800 nm                         |
| mCherry                 | 610 nm                   | 530 nm                     | 570-800 nm                         |
| JF <sub>525</sub>       | 554 nm                   | -                          | -                                  |
| TMR                     | 576 nm                   | -                          | -                                  |
| Cy3                     | 576 nm                   | -                          | -                                  |
| 580CP                   | 606 nm                   | -                          | -                                  |
| JF <sub>585</sub>       | 612 nm                   | -                          | -                                  |
| CPY                     | 628 nm                   | 580 nm                     | 610-750 nm                         |
| JF <sub>635</sub>       | 662 nm                   | 610 nm                     | 640-750 nm                         |
| Cy5                     | 664 nm                   | -                          | -                                  |
| SiR                     | 666 nm                   | 610 nm                     | 640-750 nm                         |
| JF <sub>669</sub>       | 688 nm                   | -                          | -                                  |
| YC 3.6                  | 474/528 nm               | 400 nm                     | 440-650 nm                         |
| ATeam 1.03              | 474/528 nm               | 400 nm                     | 440-650 nm                         |

**Supplementary Table 17| Analyte concentration ranges used for sensor titrations.**

| Experiment                                                                                             | Analyte                      | 10x concentration (range) | Final 1x concentration (range) |
|--------------------------------------------------------------------------------------------------------|------------------------------|---------------------------|--------------------------------|
| ChemoX-CaM titration with free Ca <sup>2+</sup> (Fig. 2c, d, ED3d, g, j)                               | Free Ca <sup>2+</sup>        | -                         | 10 nM – 39 μM*                 |
| ChemoX-CaM response to free Ca <sup>2+</sup> at different pH (ED3k)                                    | CaCl <sub>2</sub>            | 20 mM                     | 2 mM                           |
|                                                                                                        | EGTA                         | 20 mM                     | 2 mM                           |
| RFP-based calcium sensor responses to free Ca <sup>2+</sup> (Fig. S5)                                  | CaCl <sub>2</sub>            | 20 mM                     | 2 mM                           |
|                                                                                                        | EGTA                         | 20 mM                     | 2 mM                           |
| ChemoX-ATP titration with ATP or structurally similar analytes (Fig. 3c, ED5c)                         | ATP                          | 0.1 - 100 mM              | 0.01 - 10 mM                   |
|                                                                                                        | ADP                          | 0.1 - 100 mM              | 0.01 - 10 mM                   |
|                                                                                                        | AMP                          | 0.1 - 100 mM              | 0.01 - 10 mM                   |
|                                                                                                        | GTP                          | 0.1 - 100 mM              | 0.01 - 10 mM                   |
| ChemoX-NAD titration with NAD <sup>+</sup> or structurally similar analytes (Fig. 4c, d, ED6e)         | NAD <sup>+</sup>             | 10 nM – 100 mM            | 1 nM – 10 mM                   |
|                                                                                                        | NAM                          | 10 nM – 100 mM            | 1 nM – 10 mM                   |
|                                                                                                        | NR                           | 10 nM – 100 mM            | 1 nM – 10 mM                   |
|                                                                                                        | NMN                          | 10 nM – 100 mM            | 1 nM – 10 mM                   |
|                                                                                                        | NADH                         | 10 nM – 100 mM            | 1 nM – 10 mM                   |
|                                                                                                        | NADP <sup>+</sup>            | 10 nM – 100 mM            | 1 nM – 10 mM                   |
|                                                                                                        | NAAD <sup>+</sup>            | 10 nM – 100 mM            | 1 nM – 10 mM                   |
|                                                                                                        | ATP                          | 10 nM – 100 mM            | 1 nM – 10 mM                   |
|                                                                                                        | ADP                          | 10 nM – 100 mM            | 1 nM – 10 mM                   |
| ChemoX-NAD titration with NAD <sup>+</sup> in presence of structurally similar analytes (Fig. ED6f, g) | NAD <sup>+</sup> (titration) | 10 nM – 100 mM            | 1 nM – 10 mM                   |
|                                                                                                        | NAM (constant)               | 10 mM                     | 1 mM                           |
|                                                                                                        | NR (constant)                | 1 mM                      | 0.1 mM                         |
|                                                                                                        | NMN (constant)               | 1 mM                      | 0.1 mM                         |
|                                                                                                        | NADH (constant)              | 1 mM                      | 0.1 mM                         |
|                                                                                                        | NAAD <sup>+</sup> (constant) | 1 mM                      | 0.1 mM                         |
|                                                                                                        | NADP <sup>+</sup> (constant) | 1 mM                      | 0.1 mM                         |
|                                                                                                        | ATP (constant)               | 10 mM                     | 1 mM                           |
|                                                                                                        | ADP (constant)               | 10 mM                     | 1 mM                           |
| AMP (constant)                                                                                         | 10 mM                        | 1 mM                      |                                |
| ChemoD-NAD titration with NAD <sup>+</sup> (intensiometric, Fig. 5c, ED9b, d, e)                       | NAD <sup>+</sup>             | 100 nM – 100 mM           | 10 nM – 10 mM                  |
| ChemoD-NAD titration with NAD <sup>+</sup> (fluorescence lifetime, Fig. 5f, ED9f-i)                    | NAD <sup>+</sup>             | 1 μM – 100 mM             | 100 nM – 10 mM                 |
| ChemoL-NAD titration with NAD <sup>+</sup> (Fig. 6c)                                                   | NAD <sup>+</sup>             | 100 nM – 100 mM           | 10 nM – 10 mM                  |
| ChemoL-CaM titration with free Ca <sup>2+</sup> (ED10d)                                                | Free Ca <sup>2+</sup>        | -                         | 50 nM – 39 μM*                 |
| ChemoL-ATP titration with ATP (ED10f)                                                                  | NAD <sup>+</sup>             | 100 nM – 100 mM           | 10 nM – 10 mM                  |

\*For titrations of calcium sensors, special calcium buffers with defined concentrations of free Ca<sup>2+</sup> were prepared (see Analyte titrations of biosensors below for details).

**Supplementary Table 18| Settings for confocal and widefield fluorescence microscopy.**

| Figure | Construct       | Label                       | Microscope | Objective      | Excitation [nm] | Emission [nm]    | Pixel dwell time [μs] | Size [pixels] | Z size [μm] |   |
|--------|-----------------|-----------------------------|------------|----------------|-----------------|------------------|-----------------------|---------------|-------------|---|
| 1f     | ChemoG5-NLS     | -                           | Confocal   | 40x/1.10 water | 480             | 490-540          | 3.16                  | 512x512       | 5           |   |
|        |                 | TMR                         |            |                | 480             | 490-540/550-600  | 3.16                  | 512x512       | 5           |   |
|        |                 | CPY                         |            |                | 480             | 490-540/620-670  | 3.16                  | 512x512       | 5           |   |
|        |                 | SiR                         |            |                | 480             | 490-540/650-700  | 3.16                  | 512x512       | 5           |   |
| 1h     | ChemoB          | SiR                         | Confocal   | 40x/1.10 water | 405             | 420-470/650-700  | 3.16                  | 512x512       | 5           |   |
|        |                 | ChemoC                      |            |                | SiR             | 405              | 460-500/650-700       | 3.16          | 512x512     | 5 |
|        |                 | ChemoG5                     |            |                | SiR             | 480              | 490-540/650-700       | 3.16          | 512x512     | 5 |
|        |                 | ChemoY                      |            |                | SiR             | 505              | 515-565/650-700       | 3.16          | 512x512     | 5 |
|        |                 | ChemoR                      |            |                | SiR             | 550              | 570-620/650-700       | 3.16          | 512x512     | 5 |
| 2e     | ChemoG-CaM      | SiR                         | Widefield  | 20x/0.80 dry   | 470*            | 525/50, 700/75** | n.d.                  | 512x512       | 2           |   |
| 2g     | ChemoG-CaM      | SiR                         | Widefield  | 20x/0.80 dry   | 470*            | 525/50, 700/75** | n.d.                  | 256x256       | 0           |   |
| 3d     | ChemoG-ATP      | SiR                         | Confocal   | 40x/1.10 water | 480             | 490-540/650-700  | 3.16                  | 512x512       | 5           |   |
| 3f     | ChemoB-ATP      | SiR                         | Confocal   | 40x/1.10 water | 405             | 420-470/650-700  | 3.16                  | 512x512       | 5           |   |
|        |                 | ChemoG-ATP                  |            |                | SiR             | 480              | 490-540/650-700       | 3.16          | 512x512     | 5 |
|        |                 | ChemoR-ATP                  |            |                | SiR             | 550              | 570-620/650-700       | 3.16          | 512x512     | 5 |
|        |                 | ATeam 1.03                  |            |                | -               | 405              | 460-500/520-560       | 3.16          | 512x512     | 5 |
| 4e     | ChemoG-NAD      | SiR                         | Confocal   | 40x/1.10 water | 480             | 490-540/650-700  | 3.16                  | 512x512       | 0           |   |
| 4g     | ChemoB-NAD-cyto | SiR                         | Confocal   | 40x/1.10 water | 405             | 420-460/650-700  | 3.84                  | 2048x2048     | 0           |   |
|        |                 | ChemoG-NAD-mito             |            |                | SiR             | 480              | 490-540/650-700       | 3.84          | 2048x2048   | 0 |
| 4h     | ChemoB-NAD-cyto | SiR                         | Confocal   | 40x/1.10 water | 405             | 420-460/650-700  | 3.16                  | 512x512       | 4           |   |
|        |                 | ChemoG-NAD-mito             |            |                | SiR             | 480              | 490-540/650-700       | 3.16          | 512x512     | 4 |
| 5f     | ChemoD-NAD      | CPY                         | Confocal   | 40x/1.10 water | 610             | 620-670          | 1.75                  | 512x512       | 0           |   |
|        |                 | JF <sub>635</sub>           |            |                | 640             | 650-700          | 1.75                  | 512x512       | 0           |   |
|        |                 | SiR                         |            |                | 625             | 635-685          | 1.75                  | 512x512       | 0           |   |
| 5g/h   | ChemoD-NAD      | CPY                         | Confocal   | 40x/1.10 water | 610             | 620-670          | 7.69                  | 512x512       | 0           |   |
| S4a    | HT-EGFP         | SiR                         | Confocal   | 40x/1.10 water | 480             | 490-540/650-700  | 3.16                  | 512.x512      | 5           |   |
|        |                 | ChemoG1-5                   |            |                | SiR             | 480              | 490-540/650-700       | 3.16          | 512.x512    | 5 |
|        |                 | ChemoG5-NES                 |            |                | SiR             | 480              | 490-540/650-700       | 3.16          | 512.x512    | 5 |
|        |                 | ChemoG5-PDGFR <sub>tm</sub> |            |                | SiR             | 480              | 490-540/650-700       | 3.16          | 512.x512    | 0 |
|        |                 | ChemoG5-NLS                 |            |                | SiR             | 480              | 490-540/650-700       | 3.16          | 512.x512    | 5 |
|        |                 | ChemoG5-Cox8                |            |                | SiR             | 480              | 490-540/650-700       | 3.16          | 512.x512    | 0 |
|        |                 | ChemoG5-LaminB1             |            |                | SiR             | 480              | 490-540/650-700       | 3.16          | 512.x512    | 0 |
| ED7a   | ChemoG-NAD-NLS  | SiR                         | Confocal   | 40x/1.10 water | 480             | 490/540/650-700  | 3.16                  | 512x512       | 0           |   |
| ED7d   | ChemoG-NAD-mito | SiR                         | Confocal   | 40x/1.10 water | 480             | 490/540/650-700  | 3.16                  | 512x512       | 0           |   |
| S8a    | ChemoB-NAD      | SiR                         | Confocal   | 40x/1.10 water | 405             | 420-470/650/700  | 3.16                  | 512x512       | 0           |   |

|        |                 |                   |          |                |     |                 |      |         |   |
|--------|-----------------|-------------------|----------|----------------|-----|-----------------|------|---------|---|
| S8c    | ChemoR-NAD      | SiR               | Confocal | 40x/1.10 water | 550 | 570-620/650-700 | 3.16 | 512x512 | 0 |
| ED8a   | ChemoB-NAD-cyto | SiR               | Confocal | 40x/1.10 water | 405 | 420-460/650-700 | 3.16 | 512x512 | 4 |
|        | ChemoG-NAD-mito | SiR               |          |                | 480 | 490-540/650-700 | 3.16 | 512x512 | 4 |
| ED8b   | ChemoB-NAD-NLS  | SiR               | Confocal | 40x/1.10 water | 405 | 420-460/650-700 | 3.16 | 512x512 | 0 |
|        | ChemoG-NAD-mito | SiR               |          |                | 480 | 490-540/650-700 | 3.16 | 512x512 | 0 |
| ED8c   | ChemoB-NAD-NLS  | SiR               | Confocal | 40x/1.10 water | 405 | 420-460/650-700 | 3.16 | 512x512 | 4 |
|        | ChemoG-NAD-mito | SiR               |          |                | 480 | 490-540/650-700 | 3.16 | 512x512 | 4 |
| ED8d   | ChemoB-NAD-NLS  | SiR               | Confocal | 40x/1.10 water | 405 | 420-460/650-700 | 3.16 | 512x512 | 4 |
|        | ChemoG-NAD-mito | SiR               |          |                | 480 | 490-540/650-700 | 3.16 | 512x512 | 4 |
| ED9f/g | ChemoG-NAD      | SiR               | Confocal | 40x/1.10 water | 640 | 650-700         | 1.75 | 512x512 | 0 |
|        | ChemoD-NAD      | SiR               |          |                | 640 | 650-700         | 1.75 | 512x512 | 0 |
| ED9h   | ChemoD-NAD      | CPY               | Confocal | 40x/1.10 water | 610 | 620-670         | 1.75 | 512x512 | 0 |
| ED9i   | ChemoD-NAD      | JF <sub>635</sub> | Confocal | 40x/1.10 water | 620 | 635-685         | 1.75 | 512x512 | 0 |
| ED9j/k | ChemoD-NAD      | SiR               | Confocal | 40x/1.10 water | 640 | 650-700         | 7.69 | 512x512 | 0 |
| ED9l/m | ChemoD-NAD      | JF <sub>635</sub> | Confocal | 40x/1.10 water | 620 | 635-685         | 7.69 | 512x512 | 0 |

\*470 nm LED was used together with a 474/24 nm bandpass filter. \*\*525/50 nm and 700/75 nm bandpass filters were used for acquisition of EGFP and FRET(SiR) fluorescence, respectively

## Supplementary Notes

### Supplementary Note 1 – Development of ChemoG biosensors.

**Generation of sensor variants.** Certain ChemoG interface mutations increase FRET to a larger extent than others. For example, the interface mutation T225R<sup>EGFP</sup> usually leads to a stronger FRET increase than the interface mutation L271E<sup>HT7</sup>. This feature revealed useful to fine-tune the dynamic range of ChemoG-based sensors. For the generation of new sensors (**Fig. S21**), we recommend to try a palette of ChemoG FRET pairs with different interface mutations (**Supplementary Table 11**, available on Addgene). The sensing domain can be derived from an existing biosensor as *e.g.* ChemoG-CaM that was derived from YC 3.6<sup>22</sup> or a new sensing domain, preferentially exhibiting a large conformational change. To create ChemoG sensor variants, the sensing domain should be cloned between the EGFP and HaloTag7 variants (*i.e.* ChemoG FRET pairs). Using ChemoG-encoding plasmids and DNA encoding the sensing domain of interest, 6 plasmids encoding sensor variants can simply be obtained through PCR and molecular cloning (*e.g.* by Gibson assembly<sup>23</sup>). We recommend to use single GGS linkers connecting the ChemoG FRET pairs with the sensing domain but these can also be further engineered in a second step if necessary. The linkers can be created during the design of the primers used for the PCR amplification of the fragments. We deposited plasmids encoding ChemoG variants for protein production in *E. coli*. In case the sensor variants should be tested in mammalian cells, the vector backbone should first be exchanged.

**Testing sensor variants *in vitro* or *in cells*.** Two options are available:

- produce the sensor variants in *E. coli*, purify them and test them *in vitro*, or
- express and test the sensor variants in mammalian cells (require extra sub-cloning, see above).

For the first option, the purified sensor variants should be labeled with an orange/red fluorophore substrate. We recommend SiR-halo or a rhodamine substrate with similar spectral properties to minimize direct excitation of the synthetic fluorophore. The labeled sensors should then be titrated with different concentrations of an analyte of interest (AOI). The sensor variant with the largest dynamic range can be identified from fluorescence emission spectra. An ideal sensor exhibits low FRET in absence and high FRET in presence of the AOI (or *vice versa*), showing a large peak inversion in each emission channel. Some noticeable fluorescence should remain in both channels for precise measurements.

For the second option, mammalian cells should be transfected with plasmids encoding the sensor variants. The transfected cells should be labeled with cell-permeable fluorophore substrates. As previously, we recommend SiR-halo. Labeled cells can subsequently be treated with reagents known to act on the biological activity of interest (*e.g.* AOI concentration change). Via fluorescence microscopy or flow cytometry, the fluorescence profile of treated and untreated cells can be compared to identify sensor variants with the largest dynamic range. Sensors presenting noticeable fluorescence signal in both channels in presence and absence of treatment should be chosen in order to ensure precise measurement. Technical details on how to conduct the different experiments can be found in the method section of the manuscript.

### **Supplementary Note 2 – Tuning the spectral properties of the optimized ChemoG sensor.**

The spectral properties of the optimized ChemoG sensor can be tuned by exchanging the FRET donor EGFP with other fluorescent proteins and/or by using different fluorophore substrates as FRET acceptor (**Supplementary Fig. 12**). For exchanging the FRET donor, EGFP is substituted with an alternative fluorescent protein (e.g. EBFP2 = ChemoB) with the same interface mutations (e.g. EGFP<sup>T225R</sup> → EBFP2<sup>T225R</sup>) via molecular cloning. As FRET donor, we recommend EGFP-derived fluorescent proteins such as EBFP2, mCerulean3 or Venus to ensure a good transferability of the interface mutations. We recommend to use FP constructs we deposited on Addgene to ensure that the adequate FP mutations are used. For red fluorescent proteins, we recommend using mRuby2 without additional mutations for biosensor design. The FRET acceptor can be readily chosen by simply labeling the ChemoX sensors with different rhodamine-based HaloTag substrates (e.g. JF<sub>525</sub>, CPY or JF<sub>669</sub>). The ChemoX sensors performance can be evaluated as explained in **Supplementary Note 1** and in the methods.

### **Supplementary Note 3 – Tuning the readout mode of the optimized ChemoG sensor.**

The readout of ChemoG FRET sensors can be tuned by small modifications (**Supplementary Fig. 13**). Single channel fluorescence intensity and fluorescence lifetime-based ChemoD sensors are obtained by substituting EGFP with its non-fluorescent variant ShadowG<sup>18</sup> carrying the same interface mutation(s). Additionally, the fluorescence quenching mutation P174W should be introduced into HaloTag7. For intensimetric sensors, we recommend labeling with JF<sub>635</sub> while for fluorescence lifetime imaging, CPY worked best in our hands so far. The performance of the sensors can be evaluated analogously as explained in **Supplementary Note 1** and in the methods.

To convert ChemoG FRET sensors into a bioluminescent ChemoL sensor, a circularly permuted variant of NanoLuc is fused to the N-terminus of EGFP. We recommend labeling the sensor with rhodamine fluorophore substrates whose spectral properties are compatible with the available equipment. In our case, CPY was the most red-shifted fluorophore compatible with our plate reader but we foresee no conceptual hurdle in using any rhodamine fluorophore substrate proven functional for FRET biosensing. The sensors performance can be evaluated analogously as explained in **Supplementary Note 1** and in the methods. It should be noted, that the expression of ChemoL sensors in mammalian cells, assessed by direct excitation of EGFP, was found to be substantially lower than the corresponding ChemoG FRET sensors. Since bioluminescent signals can be detected with high sensitivity, *i.e.* also for sensors with low expression levels, it is possible to acquire robust emission spectra for ChemoL biosensors. Due to the dim EGFP signal, however, it is not advisable to use ChemoL sensors for FRET applications even if this is conceptually possible.

## Supplementary Note 4 – Protein sequences

### Static FRET constructs

>ChemoG5

MVSKGEELFTGVVPII~~VELDGDVNGHKFSVS~~GE~~GEDATY~~GKLT~~LFKICTTGKLPVPWP~~TLVTTLT~~YGVQCF~~SRYPD  
HMKQ~~HDFFKSAMPEGYVQERTIFFKDDGNYKTRAEVKFEGD~~TLVNRIELK~~GIDFKEDGNILGHKLEYN~~NSHN~~VYIM~~  
ADKQ~~KNGIKVNFKIRHNIEDGSVQLADHYQONTPIGDGPVLLPD~~NHYL~~STQS~~LSKDPNEKRDHMV~~LLEFV~~RAAGIT  
LGM~~DELYK~~IGTGF~~PFDPHYVEVLGERMHYVDVGPRDGT~~PVLF~~FLHGNPTSSYVWRNII~~PHVAP~~THRCIAPDL~~IGMGKS  
DKPDLGY~~FFDDHVRFM~~DAFIEALGLEEV~~LV~~IHDWGSALGFHWAKRNPERVK~~GIAFM~~E~~FIRPIPTWDEWPR~~FARR~~TF~~  
QAFRT~~TDVGRKLIIDQNVFIEGTLPMGVVRPLTEVEMDHYRE~~PFLNPVDREPLW~~RFPNELPIAGE~~PANIVALVEEYM  
DWLHQSPVPKLLFWGT~~PGVLI~~PPAEAARLAKSLPNCKAVDIGPGE~~NLLQEDNPDLIGSEIARWLSTLEISG~~

>ChemoB

MVSKGEELFTGVVPII~~VELDGDVNGHKFSVR~~GE~~GEDATY~~GKLT~~LFKICTTGKLPVPWP~~TLVTTLSHG~~VQCF~~FARYPD  
HMKQ~~HDFFKSAMPEGYVQERTIFFKDDGTYKTRAEVKFEGD~~TLVNRIELK~~GVDFKEDGNILGHKLEYN~~FN~~SHNIYIM~~  
AVKQ~~KNGIKVNFKIRHNVEDGSVQLADHYQONTPIGDGPVLLPD~~SHYL~~STQS~~LSKDPNEKRDHMV~~LLEFR~~RAAGIT  
LGM~~DELYK~~IGTGF~~PFDPHYVEVLGERMHYVDVGPRDGT~~PVLF~~FLHGNPTSSYVWRNII~~PHVAP~~THRCIAPDL~~IGMGKS  
DKPDLGY~~FFDDHVRFM~~DAFIEALGLEEV~~LV~~IHDWGSALGFHWAKRNPERVK~~GIAFM~~E~~FIRPIPTWDEWPR~~FARR~~TF~~  
QAFRT~~TDVGRKLIIDQNVFIEGTLPMGVVRPLTEVEMDHYRE~~PFLNPVDREPLW~~RFPNELPIAGE~~PANIVALVEEYM  
DWLHQSPVPKLLFWGT~~PGVLI~~PPAEAARLAKSLPNCKAVDIGPGE~~NLLQEDNPDLIGSEIARWLSTLEISG~~

>ChemoC

MVSKGEELFTGVVPII~~VELDGDVNGHKFSVS~~GE~~GEDATY~~GKLT~~LFKICTTGKLPVPWP~~TLVTTLSWG~~VQCF~~FARYPD  
HMKQ~~HDFFKSAMPEGYVQERTIFFKDDGNYKTRAEVKFEGD~~TLVNRIELK~~GIDFKEDGNILGHKLEYN~~AIHG~~NVYIT~~  
ADKQ~~KNGIKANFGLN~~CNIEDGSV~~QLADHYQONTPIGDGPVLLPD~~NHYL~~STQS~~LSKDPNEKRDHMV~~LLEFV~~RAAGIT  
LGM~~DELYK~~IGTGF~~PFDPHYVEVLGERMHYVDVGPRDGT~~PVLF~~FLHGNPTSSYVWRNII~~PHVAP~~THRCIAPDL~~IGMGKS  
DKPDLGY~~FFDDHVRFM~~DAFIEALGLEEV~~LV~~IHDWGSALGFHWAKRNPERVK~~GIAFM~~E~~FIRPIPTWDEWPR~~FARR~~TF~~  
QAFRT~~TDVGRKLIIDQNVFIEGTLPMGVVRPLTEVEMDHYRE~~PFLNPVDREPLW~~RFPNELPIAGE~~PANIVALVEEYM  
DWLHQSPVPKLLFWGT~~PGVLI~~PPAEAARLAKSLPNCKAVDIGPGE~~NLLQEDNPDLIGSEIARWLSTLEISG~~

>ChemoY

MVSKGEELFTGVVPII~~VELDGDVNGHKFSVS~~GE~~GEDATY~~GKLT~~LFKICTTGKLPVPWP~~TLVTTLGY~~GLQC~~FARYPD  
HMKQ~~HDFFKSAMPEGYVQERTIFFKDDGNYKTRAEVKFEGD~~TLVNRIELK~~GIDFKEDGNILGHKLEYN~~NSHN~~VYIT~~  
ADKQ~~KNGIKANF~~KIRHNIEDGGV~~QLADHYQONTPIGDGPVLLPD~~NHYL~~SYQS~~LSKDPNEKRDHMV~~LLEFV~~RAAGIT  
LGM~~DELYK~~IGTGF~~PFDPHYVEVLGERMHYVDVGPRDGT~~PVLF~~FLHGNPTSSYVWRNII~~PHVAP~~THRCIAPDL~~IGMGKS  
DKPDLGY~~FFDDHVRFM~~DAFIEALGLEEV~~LV~~IHDWGSALGFHWAKRNPERVK~~GIAFM~~E~~FIRPIPTWDEWPR~~FARR~~TF~~  
QAFRT~~TDVGRKLIIDQNVFIEGTLPMGVVRPLTEVEMDHYRE~~PFLNPVDREPLW~~RFPNELPIAGE~~PANIVALVEEYM  
DWLHQSPVPKLLFWGT~~PGVLI~~PPAEAARLAKSLPNCKAVDIGPGE~~NLLQEDNPDLIGSEIARWLSTLEISG~~

>ChemoR

MVSKGEAVI~~KEFMRFKVHMEGSMNGHEFEIEGEGEGRPYEGTQ~~AKLKVTKGG~~PLPFSWDILSPQFMYGSRAFTKHP~~  
ADIPDY~~YKQSFPEGFKWERVMNFEDGGAVTVTQDTSLEDGTLIYKVKLRG~~TNFPDGPVMQ~~KKTMGWEASTERLYPE~~  
DGLV~~LKGDIKMALRLKDGGRYLADFKTTYKAKKPVQMPGAYNVDRKL~~KITSHNEDY~~TVVEQYERSEGRHSTGGMDELY~~  
KIGTGF~~PFDPHYVEVLGERMHYVDVGPRDGT~~PVLF~~FLHGNPTSSYVWRNII~~PHVAP~~THRCIAPDL~~IGMGKSDKPDLGY  
FFDDHVR~~FM~~DAFIEALGLEEV~~LV~~IHDWGSALGFHWAKRNPERVK~~GIAFM~~E~~FIRPIPTWDEWPEFARETFQAFRTTD~~  
VGRKLIIDQNVFIEGTLPMGVVRPLTEVEMDHYRE~~PFLNPVDREPLW~~RFPNELPIAGEPANIVALVEEYMDWLHQSP  
VPKLLFWGT~~PGVLI~~PPAEAARLAKSLPNCKAVDIGPGLNLLQEDNPDLIGSEIARWLSTLEISG

EGFP, EBFP2, mCerulean3, Venus, mScarlet

HaloTag7

Interface mutations (XFP<sup>A206K</sup>, XFPT<sup>225R</sup>, HT7<sup>E143R</sup>, HT7<sup>E147R</sup>, HT7<sup>L271E</sup>, mScarlet<sup>D201K</sup>, EBFP2<sup>N39Y</sup>)



## Calcium sensors

### >ChemoG-CaM

MVSKGEELFTGVVPIILVELDGDVNGHKFSVSGEGEGDATYGKLTLLKFICTTGKLPVPWPPTLVTTLTLYGVQCFSRYPD  
HMKQHDFFKSAMPEGYVQERTIFFKDDGNYKTRAEVKFEGDTLVNRIELKIDFKEDGNILGHKLEYNNSHNVYIM  
ADKQKNGIKVNFKIRHNIEDGSVQLADHYQONTPIGDGPVLLPDNHYLSTQSKLSKDPNEKRDHMLLEFVTAAGIT  
GGTLPDQLTEEQIAEFKEAFSLFDKGDGTITTKELGTVMRS LGQNPTEAELQDMINEVDADGDGTIDFPEFLTMMAR  
KMKD TDSEEEIREAFRVFDKDGNGYISAAELRHVMTNLGEKLTDEEVDEMIREADIDGDGQVNYEEFVMMTAK  
EFP  
PPPPPPPPPPPPPPPPPPPPPPPPPPPPPPPPPPPPPPPPPPPPPPGGSMVDSRRKFNKTGKALRAIGRLSSLES  
GGIGTGFPFDPHYVEVL  
GERMHYVDVGPRDGT PVLFLHGNPTSSYVWRNIIPHVAPTHRCIAPDLIGMGKSDKPD LGYFFDDHVRFM  
DAFIEAL  
GLEEVVLVIHDWGSALGFHWAKRNP ERVKGIAFM EFIRPIPTWDEWPEFARETFQAFRTTDVGRKLIIDQ  
NVFIEGT  
LPMGVVRPLTEVEMDHYREPFLNPVDREPLWRFPNELPIAGEPANIVALVEEYMDWLHQSPVPKLLFWGT  
PGVLIIPP  
AEAARLAKSLPNCKAVDIGPGENLLQEDNPDLIGSEIARWLSTLEISG

### >ChemoB-CaM

MVSKGEELFTGVVPIILVELDGDVNGHKFSVRGEGEGDATY G KLTLLKFICTTGKLPVPWPPTLVTTLSHG  
VQC FARYPD  
HMKQHDFFKSAMPEGYVQERTIFFKDDGTYKTRAEVKFEGDTLVNRIELKGVDFKEDGNILGHKLEYNFNSH  
NIYIM  
AVKQKNGIKVNFKIRHNVEDGSVQLADHYQONTPIGDGPVLLPDSHYLSTQSKLSKDPNEKRDHMLLEFRT  
AAGIT  
GGTLPDQLTEEQIAEFKEAFSLFDKGDGTITTKELGTVMRS LGQNPTEAELQDMINEVDADGDGTIDFPE  
FLTMMAR  
KMKD TDSEEEIREAFRVFDKDGNGYISAAELRHVMTNLGEKLTDEEVDEMIREADIDGDGQVNYEEFV  
MMTAK  
EFP  
PPPPPPPPPPPPPPPPPPPPPPPPPPPPPPPPPPPPPPPPPPPPPPGGSMVDSRRKFNKTGKALRAIGRL  
SSLES  
GGIGTGFPFDPHYVEVL  
GERMHYVDVGPRDGT PVLFLHGNPTSSYVWRNIIPHVAPTHRCIAPDLIGMGKSDKPD LGYFFDDHVR  
FM  
DAFIEAL  
GLEEVVLVIHDWGSALGFHWAKRNP ERVKGIAFM EFIRPIPTWDEWPEFARETFQAFRTTDVGRKLIID  
Q  
NVFIEGT  
LPMGVVRPLTEVEMDHYREPFLNPVDREPLWRFPNELPIAGEPANIVALVEEYMDWLHQSPVPKLLFWGT  
PGVLIIPP  
AEAARLAKSLPNCKAVDIGPGENLLQEDNPDLIGSEIARWLSTLEISG

### >ChemoC-CaM

MVSKGEELFTGVVPIILVELDGDVNGHKFSVSGEGEGDATYGKLTLLKFICTTGKLPVPWPPTLVTTLSW  
GVQC FARYPD  
HMKQHDFFKSAMPEGYVQERTIFFKDDGNYKTRAEVKFEGDTLVNRIELKIDFKEDGNILGHKLEYNAIH  
GNVYIT  
ADKQKNGIKANFGLN CNIEDGSVQLADHYQONTPIGDGPVLLPDNHYLSTQSKLSKDPNEKRDHMLLEF  
VTAAGIT  
GGTLPDQLTEEQIAEFKEAFSLFDKGDGTITTKELGTVMRS LGQNPTEAELQDMINEVDADGDGTIDFPE  
FLTMMAR  
KMKD TDSEEEIREAFRVFDKDGNGYISAAELRHVMTNLGEKLTDEEVDEMIREADIDGDGQVNYEEFV  
MMTAK  
EFP  
PPPPPPPPPPPPPPPPPPPPPPPPPPPPPPPPPPPPPPPPPPPPPPGGSMVDSRRKFNKTGKALRAIGRL  
SSLES  
GGIGTGFPFDPHYVEVL  
GERMHYVDVGPRDGT PVLFLHGNPTSSYVWRNIIPHVAPTHRCIAPDLIGMGKSDKPD LGYFFDDHVR  
FM  
DAFIEAL  
GLEEVVLVIHDWGSALGFHWAKRNP ERVKGIAFM EFIRPIPTWDEWPEFARETFQAFRTTDVGRKLIID  
Q  
NVFIEGT  
LPMGVVRPLTEVEMDHYREPFLNPVDREPLWRFPNELPIAGEPANIVALVEEYMDWLHQSPVPKLLFWGT  
PGVLIIPP  
AEAARLAKSLPNCKAVDIGPGENLLQEDNPDLIGSEIARWLSTLEISG

### >ChemoY-CaM

MVSKGEELFTGVVPIILVELDGDVNGHKFSVSGEGEGDATYGKLTLLKLICTTGKLPVPWPPTLVTTLGY  
GLQC FARYPD  
HMKQHDFFKSAMPEGYVQERTIFFKDDGNYKTRAEVKFEGDTLVNRIELKIDFKEDGNILGHKLEYNNSH  
NVYIT  
ADKQKNGIKANFKIRHNIEDGGVQLADHYQONTPIGDGPVLLPDNHYLSYQSKLSKDPNEKRDHMLLEF  
VTAAGIT  
GGTLPDQLTEEQIAEFKEAFSLFDKGDGTITTKELGTVMRS LGQNPTEAELQDMINEVDADGDGTIDFPE  
FLTMMAR  
KMKD TDSEEEIREAFRVFDKDGNGYISAAELRHVMTNLGEKLTDEEVDEMIREADIDGDGQVNYEEFV  
MMTAK  
EFP  
PPPPPPPPPPPPPPPPPPPPPPPPPPPPPPPPPPPPPPPPPPPPPPGGSMVDSRRKFNKTGKALRAIGRL  
SSLES  
GGIGTGFPFDPHYVEVL  
GERMHYVDVGPRDGT PVLFLHGNPTSSYVWRNIIPHVAPTHRCIAPDLIGMGKSDKPD LGYFFDDHVR  
FM  
DAFIEAL  
GLEEVVLVIHDWGSALGFHWAKRNP ERVKGIAFM EFIRPIPTWDEWPEFARETFQAFRTTDVGRKLIID  
Q  
NVFIEGT  
LPMGVVRPLTEVEMDHYREPFLNPVDREPLWRFPNELPIAGEPANIVALVEEYMDWLHQSPVPKLLFWGT  
PGVLIIPP  
AEAARLAKSLPNCKAVDIGPGENLLQEDNPDLIGSEIARWLSTLEISG

### >ChemoR-CaM

MVSKGEELIKENMRMKVVMESVNGHQFKCTGEGEGNPYMGQTQTMRIKVIIEGGPLPFAFDILATSFMYG  
SRTFIKYP  
KGIPIDFFKQSFPEGFTWERVTRYEDGGVVTVMQDTSLEDGCLVYHVQVRGVNFP SNGPVMQKKT  
KGWEPNTEMMYPA  
DGGLRGYTHMALKVDGGGHLSCSFVTTYRSKKT VGNIKMPGIHAVDHRLEERLEESDNEMFVVQREH  
AVAKFAGLGGG

MDELYKGGTLPDQLTEEQIAEFKEAFSLFDKDGDTITTKELGTVMRS LGQNPTAEALQDMINEVDADGDGTIDFPE  
FLTMMARKMKD TDSEEEIREAFRVFDKDGNGYISAAELRHVMTNLGEKLTDEEVDEMIREADIDGDGQVNYEEFVVM  
MTAKEFPPPPPPPPPPPPPPPPPPPPPPPPPPPPPPPPPPPPPPPPPPPPPPGGSMVDSRRKFNKTGKALRAIGRLSSLES  
GGIGTGFPFDPHYVEVLGERMHYVDVGPRDGT PVLFLHGNPTSSYVWRNIIPHVAPTHRCIAPDLIGMGKSDKPD  
LGYFFDDHVRFMDAFIEALGLEEVVLVIHDWGSALGFHWAKRNP ERVKGIAFMFIRPIPTWDEWPEFARETFQAFRTT  
DVGRKLIIDQNVFIEGTLPMGVVRRPLTEVEMDHYREPFLNPVDREPLWRFPNELPIAGEPANIVALVEEYMDW  
LHQSPVPKLLFWGTPGVLI PPAEAARLAKSLPNCKAVDIGPGENLLQEDNPD LIGSEIARWLSTLEISG

>ChemoL-CaM

MGLSGDQMGQIEKIFKVVPVDDHHFKVILHYGTLVIDGVTN MIDYFGRPYEGIAVFDGKKITVTGTLWNGNKIID  
ERLINPDGSL LFRVTINGVTGWRLCERILAGGTGGSGGTGGSMVFTLEDFVGDWRQTAGYNLDQVLEQGGVSSLFQ  
NLGVSVTPIQRIVLSGENGLKIDIHV IIPYEVSKGEELFTGVVPI LVELDGDVNGHKFSVS GEGEGDATY GKLTLKFI  
CTTGKLPVPWPPTLVTTLT YGVQCFSRYPDHMKQHDFFKSAMPEGYVQERTIFFKDDGNYKTRAEVKFE GDTLVNRIE  
LKGIDFKEDGNILGHKLEYNYN SHNVYIMADKQKNGIKVNFKIRHNIEDG SVQLADHYQONTPIGDGPVLLPDNHYL  
STQSLSKDPNEKRDMVLL E FVTAAGITGGTLPDQLTEEQIAEFKEAFSLFDKDGDTITTKELGTVMRS LGQNPT  
EAELQDMINEVDADGDGTIDFPEFLTMMARKMKD TDSEEEIREAFRVFDKDGNGYISAAELRHVMTNLGEKLTDEEV  
DEMIREADIDGDGQVNYEEFVVM TAKEFPPPPPPPPPPPPPPPPPPPPPPPPPPPPPPPPPPPPPPPPPPPPPPGGSMVDS  
RRKFNKTGKALRAIGRLSSLES GGIGTGFPFDPHYVEVLGERMHYVDVGPRDGT PVLFLHGNPTSSYVWRNIIPHVAP  
THRCIAPDLIGMGKSDKPD LGYFFDDHVRFMDAFIEALGLEEVVLVIHDWGSALGFHWAKRNP ERVKGIAFMFIRPIPTW  
DEWPEFARETFQAFRTT DVGRKLIIDQNVFIEGTLPMGVVRRPLTEVEMDHYREPFLNPVDREPLWRFPNELPIAGEPA  
NIVALVEEYMDW LHQSPVPKLLFWGTPGVLI PPAEAARLAKSLPNCKAVDIGPGENLLQEDNPD LIGSEIARWLSTLEISG

EGFP, EBFP2, mCerulean3, Venus, mRuby2, cpNanoLuc

HaloTag7

Calmodulin

M13 peptide

Linker

Interface mutations (XFP<sup>A206K</sup>, HT7<sup>L271E</sup>, EBFP2<sup>N39Y</sup>)

## ATP sensors

### >ChemoG-ATP

MVSKGEELFTGVVPIIVELDGDVNGHKFSVSGEGEGDATYGKLTLLKFICTTGKLPVPWPPTLVTTLTLYGVQCFSRYPD  
HMKQHDFFKSAMPEGYVQERTIFFKDDGNYKTRAEVKFEEDTLVNRIELKIDFKEDGNILGHKLEYNNSHNVIYIM  
ADKQKNGIKVNFKIRHNIEDGSVQLADHYQONTPIGDGPVLLPDNHYLSTQSLSKDPNEKRDRHMLLEFVTAAGIT  
GGGMKTVKVNITTPDGPVYDAD IEMVSVRAESGDLGILPGHIPKAPLKI GAVRLKKDGQTEMVAVSGGTVEVRPDH  
VTINAQAAETAEGIDKERAEAAARQRAQERLNSQSDDTDIRRAELALQRALNRLDVAGKANEFGGGIGTGFPDFPHYV  
EVLGERMHYVDVGPDRDGT PVLFLHGNPTSSYVWRNIIPHVAPTHRCIAPDLIGMGKSDKPDLYFFDDHVRFMDFAI  
EALGLEEVVLIHWDGWSALGFHWAKRNPERVKGIAFMFIRPIPTWDEWPEFARETTFQAFRTTDVGRKLIIDQNVFI  
EGTLPNGVVRPLTEVEMDHYREPFLNPVDREPLWRFPNELPIAGEPANIVALVEEYMDWLHQSPVPKLLFWGTPGVLI  
PPAEAAARLAKSLPNCKAVDIGPGENLLQEDNPDLIGSEIARWLSTLEISG

### >ChemoB-ATP

MVSKGEELFTGVVPIIVELDGDVNGHKFSVRGEGEGDATYGKLTLLKFICTTGKLPVPWPPTLVTTLSHGVCFAFYPD  
HMKQHDFFKSAMPEGYVQERTIFFKDDGTYKTRAEVKFEEDTLVNRIELKGVDFKEDGNILGHKLEYNFNSHNIYIM  
AVKQKNGIKVNFKIRHNVEDGSVQLADHYQONTPIGDGPVLLPDSHYLSTQSLSKDPNEKRDRHMLLEFRTAAGIT  
GGGMKTVKVNITTPDGPVYDAD IEMVSVRAESGDLGILPGHIPKAPLKI GAVRLKKDGQTEMVAVSGGTVEVRPDH  
VTINAQAAETAEGIDKERAEAAARQRAQERLNSQSDDTDIRRAELALQRALNRLDVAGKANEFGGGIGTGFPDFPHYV  
EVLGERMHYVDVGPDRDGT PVLFLHGNPTSSYVWRNIIPHVAPTHRCIAPDLIGMGKSDKPDLYFFDDHVRFMDFAI  
EALGLEEVVLIHWDGWSALGFHWAKRNPERVKGIAFMFIRPIPTWDEWPEFARETTFQAFRTTDVGRKLIIDQNVFI  
EGTLPNGVVRPLTEVEMDHYREPFLNPVDREPLWRFPNELPIAGEPANIVALVEEYMDWLHQSPVPKLLFWGTPGVLI  
PPAEAAARLAKSLPNCKAVDIGPGENLLQEDNPDLIGSEIARWLSTLEISG

### >ChemoR-ATP

MVSKGEELIKENMRMKVVMESVNGHQFKCTGEGEGNPYMGQTQTMRIKVIIEGGPLPFAFDILATSFMYGSRTFIKYP  
KGIPIDFFKQSFPEGFTWERVTRYEDGGVVTVMQDTSLEDGCLVYHVQVRGVNFPNSNGPVMQKKTGWEPNTEMMYPA  
DGLRGRYTHMALKVDGGGHLSCSFVTTYRSKKTVGNIKMPGIHAVDHRLEERLEESDNEMFVVQREHAVAKFAGLGGG  
MDELYKGGGMKTVKVNITTPDGPVYDAD IEMVSVRAESGDLGILPGHIPKAPLKI GAVRLKKDGQTEMVAVSGGTV  
EVRPDHVTINAQAAETAEGIDKERAEAAARQRAQERLNSQSDDTDIRRAELALQRALNRLDVAGKANEFGGGIGTGFP  
FDPHYVEVLGERMHYVDVGPDRDGT PVLFLHGNPTSSYVWRNIIPHVAPTHRCIAPDLIGMGKSDKPDLYFFDDHVR  
FMDAFIEALGLEEVVLIHWDGWSALGFHWAKRNPERVKGIAFMFIRPIPTWDEWPEFARETTFQAFRTTDVGRKLIID  
QNVFIEGTLPMGVVRPLTEVEMDHYREPFLNPVDREPLWRFPNELPIAGEPANIVALVEEYMDWLHQSPVPKLLFW  
GTPGVLIIPAEAAARLAKSLPNCKAVDIGPGENLLQEDNPDLIGSEIARWLSTLEISG

### >ChemoL-ATP

MGLSGDQMGQIEKIFKVVPVDDHHFKVILHYGTLVIDGVTNPMIDYFGRPYEGIAVFDGKKITVTGTLWNGNKIID  
ERLINPDGSLFRVTINGVTGWRLCERILAGGTGGSGGTGGSMVFTLEDVFGDWRQTAGYNLDQVLEQGGVSSLFQN  
LGVSVTPIQRIVLSENGLKIDIHVIIPYEVSKGEELFTGVVPIIVELDGDVNGHKFSVSGEGEGDATYGKLTLLKFI  
CTTGKLPVPWPPTLVTTLTLYGVQCFSRYPDHMKQHDFFKSAMPEGYVQERTIFFKDDGNYKTRAEVKFEEDTLVNRIE  
LKGIDFKEDGNILGHKLEYNNSHNVIYIMADKQKNGIKVNFKIRHNIEDGSVQLADHYQONTPIGDGPVLLPDNHYL  
STQSLSKDPNEKRDRHMLLEFVTAAGITGGGMKTVKVNITTPDGPVYDAD IEMVSVRAESGDLGILPGHIPKAPL  
KIGAVRLKKDGQTEMVAVSGGTVEVRPDHVTINAQAAETAEGIDKERAEAAARQRAQERLNSQSDDTDIRRAELALQ  
RALNRLDVAGKANEFGGGIGTGFPDFPHYVEVLGERMHYVDVGPDRDGT PVLFLHGNPTSSYVWRNIIPHVAPTHRCI  
APDLIGMGKSDKPDLYFFDDHVRFMDFAI EALGLEEVVLIHWDGWSALGFHWAKRNPERVKGIAFMFIRPIPTWDE  
WPEFARETTFQAFRTTDVGRKLIIDQNVFIEGTLPMGVVRPLTEVEMDHYREPFLNPVDREPLWRFPNELPIAGEPAN  
IVALVEEYMDWLHQSPVPKLLFWGTPGVLIIPAEAAARLAKSLPNCKAVDIGPGENLLQEDNPDLIGSEIARWLSTLE  
ISG

EGFP, EBFP2, mRuby2, cpNanoLuc

HaloTag7

F<sub>o</sub>-F<sub>1</sub> & subunit

Linker

Interface mutation (EGFP<sup>A206K</sup>, HT7<sup>L271E</sup>, EBFP2<sup>N39Y</sup>)

## NAD<sup>+</sup> sensors

### >ChemoG-NAD

MVSKGEELFTGVVPIIIVELDGDVNGHKFSVSGEGEGDATYGKLTLLKFICTTGKLPVPWPPTLVTTLLTYGVQCFSRYPD  
HMKQHDFFKSAMPEGYVQERTIFFKDDGNYKTRAEVKFEGDTLVNRIELKIDFKEDGNILGHKLEYNNSHNVIYIM  
ADKQKNGIKVNFKIRHNIEDGSVQLADHYQONTPIGDGPVLLPDNHYLSTQSKLSKDPNEKRDRHMLLEFVRAAGIT  
GGTMTLEEARKRVNELRDLIRYHNYRYVVLADPEISDAEYDRLRELKELEERFPELKSPDSPTLQVGARPLEATFR  
PVRHPTRMYSLDNAFNLDDELKAFEERIERALGRKGPFAYTVEHLVDGLSVNLYEYEGVLVYGATRGDGEVGEVTON  
LLTIPTIPRRLKGVPERLEVRGEVYMPIEAFRLNNEELEERGERIFKNPRNAAAGSLRQKDPRI TAKRGLRATFWAL  
GLGLEEVEREGVATQFALLHWLKEKGFVVEHGYARAVGAEGVEAVYQDWLKKRRALPFEANGVAVKLDELALWRELG  
YTARAPRFAIAYKFPSSGGIGTGFPFDPHYVEVLGERMHYVDVGPDRGT PVLFLHGNPTSSYVWRNIIPHVAPTHRCI  
APDLIGMGKSDKPDLYFFDDHVRFMDFIEALGLEEVVLIHDWGSALGFHWAKRNPVVKGIAFMFIRPIPTWD  
EWPEFARETQAFRTTVDVGRKLIIDQNVFIEGTLPMGVVRPLTEVEMDHYREPFLNPVDREPLWRFPNELPIAGEPA  
NIVALVEEYMDWLHQSPVPKLLFWGTPGVLIIPPAEAARLAKSLPNCKAVDIGPGENLLQEDNPDIGSEIARWLSTL  
EISG

### >ChemoB-NAD

MVSKGEELFTGVVPIIIVELDGDVNGHKFSVRGEEGEGDATY G KLTLLKFICTTGKLPVPWPPTLVTTLSHGVC FARYPD  
HMKQHDFFKSAMPEGYVQERTIFFKDDGTYKTRAEVKFEGDTLVNRIELKGVDFKEDGNILGHKLEYNFNSHNVIYIM  
AVKQKNGIKVNFKIRHNVEDGSVQLADHYQONTPIGDGPVLLPDSHYLSTQSKLSKDPNEKRDRHMLLEFRRAAGIT  
GGTMTLEEARKRVNELRDLIRYHNYRYVVLADPEISDAEYDRLRELKELEERFPELKSPDSPTLQVGARPLEATFR  
PVRHPTRMYSLDNAFNLDDELKAFEERIERALGRKGPFAYTVEHLVDGLSVNLYEYEGVLVYGATRGDGEVGEVTON  
LLTIPTIPRRLKGVPERLEVRGEVYMPIEAFRLNNEELEERGERIFKNPRNAAAGSLRQKDPRI TAKRGLRATFWAL  
GLGLEEVEREGVATQFALLHWLKEKGFVVEHGYARAVGAEGVEAVYQDWLKKRRALPFEANGVAVKLDELALWRELG  
YTARAPRFAIAYKFPSSGGIGTGFPFDPHYVEVLGERMHYVDVGPDRGT PVLFLHGNPTSSYVWRNIIPHVAPTHRCI  
APDLIGMGKSDKPDLYFFDDHVRFMDFIEALGLEEVVLIHDWGSALGFHWAKRNPVVKGIAFMFIRPIPTWD  
EWPEFARETQAFRTTVDVGRKLIIDQNVFIEGTLPMGVVRPLTEVEMDHYREPFLNPVDREPLWRFPNELPIAGEPA  
NIVALVEEYMDWLHQSPVPKLLFWGTPGVLIIPPAEAARLAKSLPNCKAVDIGPGENLLQEDNPDIGSEIARWLSTL  
EISG

### >ChemoR-NAD

MVSKGEELIKENMRMKVMEGSVNGHQFKCTGEGEGNPYMGQTQTMRIKVIIEGGPLPFAFDILATSFMYGSRTFIKYP  
KGIPIPDFFKQSFPEGFTWERVTRYEDGGVVTVMQDTSLEDGCLVYHVQVRGVNFPNSNGPVMQKKTGWEPNTEMMYPA  
DGGLRGYTHMALKVDGGGHLSCSFVTYRSKKTVGNIKMGPPIHAVDHRLEERLEESDNEMFVVQREHAVAKFAGLGGG  
MDELYKGGTMTLEEARKRVNELRDLIRYHNYRYVVLADPEISDAEYDRLRELKELEERFPELKSPDSPTLQVGAR  
LEATFRPVRHPTRMYSLDNAFNLDDELKAFEERIERALGRKGPFAYTVEHLVDGLSVNLYEYEGVLVYGATRGDGEV  
EVTQNTLLTIPTIPRRLKGVPERLEVRGEVYMPIEAFRLNNEELEERGERIFKNPRNAAAGSLRQKDPRI TAKRGLR  
ATFWALGLGLEEVEREGVATQFALLHWLKEKGFVVEHGYARAVGAEGVEAVYQDWLKKRRALPFEANGVAVKLDELA  
LWRELGYTARAPRFAIAYKFPSSGGIGTGFPFDPHYVEVLGERMHYVDVGPDRGT PVLFLHGNPTSSYVWRNIIPHVA  
PTHRCIAPDLIGMGKSDKPDLYFFDDHVRFMDFIEALGLEEVVLIHDWGSALGFHWAKRNPVVKGIAFMFIR  
PIPTWDEWPEFARETQAFRTTVDVGRKLIIDQNVFIEGTLPMGVVRPLTEVEMDHYREPFLNPVDREPLWRFPNELP  
IAGEPANIVALVEEYMDWLHQSPVPKLLFWGTPGVLIIPPAEAARLAKSLPNCKAVDIGPGENLLQEDNPDIGSEIA  
RWLSTLEISG

### >ChemoD-NAD

MVSKGEELFTGVVPIIIVELDGDVNGHKFSVSGEGEGDATYGKLTLLKLICTTGKLPVPWPPTLVTTFFGYGLMCFARYPD  
HMKQHDFFKSAMPEGYVQERTIFFKDDGNYKTRAEVKFEGDTLVNRIELKIDFKEDGNILGHKLEYNNSHNVIYIM  
ADKQKNGIKVNFKIRHNIEDGSVQLADHYQONTPIGDGPVLLPDNHYLSTQSKLSKDPNEKRDRHMLLEFVRAAGIT  
GGTMTLEEARKRVNELRDLIRYHNYRYVVLADPEISDAEYDRLRELKELEERFPELKSPDSPTLQVGARPLEATFR  
PVRHPTRMYSLDNAFNLDDELKAFEERIERALGRKGPFAYTVEHLVDGLSVNLYEYEGVLVYGATRGDGEVGEVTON  
LLTIPTIPRRLKGVPERLEVRGEVYMPIEAFRLNNEELEERGERIFKNPRNAAAGSLRQKDPRI TAKRGLRATFWAL  
GLGLEEVEREGVATQFALLHWLKEKGFVVEHGYARAVGAEGVEAVYQDWLKKRRALPFEANGVAVKLDELALWRELG  
YTARAPRFAIAYKFPSSGGIGTGFPFDPHYVEVLGERMHYVDVGPDRGT PVLFLHGNPTSSYVWRNIIPHVAPTHRCI  
APDLIGMGKSDKPDLYFFDDHVRFMDFIEALGLEEVVLIHDWGSALGFHWAKRNPVVKGIAFMFIRPIPTWD

EWPEFARETFFQAFRTTDDVGRKLIIDQNVFIEGTLTMMGVVVRPLTEVEMDHYREPFLNPVDREPLWRFPNELPIAGEPANIVALVEEYMDWLHQSPVPKLLFWGTPGVLI PPAAEARLAKSLPNCKAVDIGPGEENLLQEDNPDLIGSEIARWLSTLEISG

>ChemoL-NAD

MGLSGDQMGQIEKIFKVVYPVDDHHFKVILHYGTLVIDGVTNPMIDYFGRPYEGIAVFDGKKITVTGTLWNGNKIIDERLINPDGSLLEFRVTINGVTGWRLCERILAGGTGGSGGTGGSMVFTLEDFVGDWRQTAGYNLDQVLEQGGVSSSLFQNLGVSVTPIQRIVLSGENGLKIDIHVIIIPYEVSKGEEELFTGVVPIILVELDGDVNGHKFSVSGEGEGDATYGKLTTLKFICTTGKLPVPWPPTLVTTLTYGVCFSRYPDHMKQHDFFKSAMPEGYVQERTIFFKDDGNYKTRAEVKFEEDTLVNRIELKSIDFKEDGNILGHKLEYNYNSHNVYIMADKQKNGIKVNFKIRHNIEDGVSQVLADHYQQNTPIGDGPVLLPDNHYLSTQSLLSKDPNEKRDHMLLEFVLAAGITGGTMTLEEARKRVNELRDLIRYHNYRYVVLADPEISDAEYDRLLRELKLEERFPELKS PDSPTLQVGARPLEATFRPVRHPTRMYSLDNAFNLDDELKAFEERIERALGRKGPFAITVEHLVDGLSVNLYEEGVLVYGATRGDGEVGEVVTQNLITPTIPRRLKGVPERLEVRGEVYMPIEAFRLRNEELEERGERIFKNPRNAAAGSLRQKDPRI TAKRGLRATFWALGLGLEEVEREGVATQFALLHWLKEKGFVEHGYARAVGAEGVEAVYQDWLKKRRALPFEANGVAVKLDLALWRELGYTARAPRFAIAYKFPSSGGIGTGFPFDPHYVEVLGERMHYVDVGPDRGTPVLFHLGNPTSSYVWRNIIIPHVAPTHRCIAPDLIGMKS DKPDLGYFFDDHVRFMDFIEALGLEEVVLIHDWGSALGFHWAKRNP ERVKGIAFMFIRPIPTWDEWPEFARETFFQAFRTTDDVGRKLIIDQNVFIEGTLPMGVVVRPLTEVEMDHYREPFLNPVDREPLWRFPNELPIAGEPANIVALVEEYMDWLHQSPVPKLLFWGTPGVLI PPAAEARLAKSLPNCKAVDIGPGEENLLQEDNPDLIGSEIARWLSTLEISG

EGFP, EBFP2, mRuby2, ShadowG, cpNanoLuc

*ttLigA*

HaloTag7

Linker

Interface mutations (EGFP<sup>A206K</sup>, EGFP<sup>T225R</sup>, HT7<sup>L271E</sup>)

Catalytic mutations *ttLigA* (K117L, D289N)

Affinity mutations *ttLigA* (Y226W, V292A)

HT7<sup>P174W</sup>

### Supplementary Note 5 – Purification sequences

>Strep-tag®II + enterokinase cleavage sequence (N-terminal)

WSHPQFEKGADDDDKVPH [...] (pET-51b(+)) plasmids)

>Poly-histidine tag sequence (C-terminal)

[...] APGFSSISAHHHHHHHHHH

>Poly-histidine tag + TEV cleavage sequence (N-terminal)

HHHHHHHHHHENLYFQGGG [...] (pET-51b(+)) plasmids for crystallography)

### Supplementary Note 6 – Localization sequences

>Nuclear exit signal (NES) (N-terminal or C-terminal)

[...] LPPLERLTL (pCDNA5 plasmids)

LQNELALKLAGLDINKTGGS [...] (pAAV plasmids)

>Nuclear localization sequence (NLS) (C-terminal, 3 copies)

[...] KSGLRSRADPKKKRKVDPKKKRKVDPKKKRKVGSTGSR

>Exterior plasma membrane localization sequence (IgKchL[...]IPDGFR<sub>tm</sub>) (N-terminal and C-terminal)

METDTLLLWVLLLWVPGSTGDYPYDVPDYA [...] EQKLI SEEDLNAVQDQTQEVIVVPHSLPFKVVVISAILALVVLTIISLIILIMLWQKKPR

>Nuclear envelope (LaminB1) localization sequence (C-terminal)

[...] MATATPVPPRMGSRAGGPTTPLSPTRL SRLQEKEELRELNDR LAVYIDKVR SLETENSALQLQVTEREEVGRGLTGLKALYETELADARRALDDTARERAKLQIELGKCKAEHDQLLLNYAKKESDLNGAQIKLREYEAALNSKDAALATALGDKKSLEGDLEDLKDQIAQLEASLAAAKQLADETLLKVDLENRCQSLTEDLEFRKSMYEEEINETRKHETRLVEVDSGRQIEYKLAQALHEMREQHDAQVRLYKEELEQTYHAKLENARLSSEMNTSTVNSAREELMESRMRIESLSSQLSNLQKESRACLERIQELEDLLAKEKDNSRRLTDKEREMAEIRDQMQQQLNDYEQLLDVKLALDMEISAYRKLLEGEEERLKLSPSPSSRVTVSRASSRSVRTRGKRKRVDVEESEASSSVSISHSASATGNVCIEEIDVDGKFIRLKNTSEQDQPMGGWEMIRKIGDTSVSYKYTSRYVLKAGQTVTIWAANAGVTASPTDLIWKQNQSWGTGEDVKVILKNSQGEVAQRSTVFKTTIPEEEEEEEEAAGVVVEEELFHQQGTPRASNRSCAIM

>Mitochondrial localization sequence (Cox8) (N-terminal, 4 copies)

4x [MSVLTPLLLRGLTG SARLPV PRAKIHSLVLTPLLLRGLTG SARLPV PRAKIHSL] [...]

## References

1. Grimm, J.B. et al. A general method to optimize and functionalize red-shifted rhodamine dyes. *Nat Methods* **17**, 815-821 (2020).
2. Grimm, J.B. et al. A general method to improve fluorophores for live-cell and single-molecule microscopy. *Nat Methods* **12**, 244-250, 243 p following 250 (2015).
3. Lukinavicius, G. et al. Fluorescent dyes and probes for super-resolution microscopy of microtubules and tracheoles in living cells and tissues. *Chem Sci* **9**, 3324-3334 (2018).
4. Butkevich, A.N. et al. Fluorescent Rhodamines and Fluorogenic Carbopyronines for Super-Resolution STED Microscopy in Living Cells. *Angew Chem Int Ed Engl* **55**, 3290-3294 (2016).
5. Lukinavicius, G. et al. A near-infrared fluorophore for live-cell super-resolution microscopy of cellular proteins. *Nat Chem* **5**, 132-139 (2013).
6. Wilhelm, J. et al. Kinetic and Structural Characterization of the Self-Labeling Protein Tags HaloTag7, SNAP-tag, and CLIP-tag. *Biochemistry* **60**, 2560-2575 (2021).
7. Farrants, H. et al. Chemogenetic Control of Nanobodies. *Nat Methods* **17**, 279-282 (2020).
8. Subach, O.M., Cranfill, P.J., Davidson, M.W. & Verkhusha, V.V. An enhanced monomeric blue fluorescent protein with the high chemical stability of the chromophore. *PLoS One* **6**, e28674 (2011).
9. Thestrup, T. et al. Optimized ratiometric calcium sensors for functional in vivo imaging of neurons and T lymphocytes. *Nat Methods* **11**, 175-182 (2014).
10. Fritz, R.D. et al. A versatile toolkit to produce sensitive FRET biosensors to visualize signaling in time and space. *Sci Signal* **6**, rs12 (2013).
11. Bindels, D.S. et al. mScarlet: a bright monomeric red fluorescent protein for cellular imaging. *Nat Methods* **14**, 53-56 (2017).
12. Brun, M.A. et al. A semisynthetic fluorescent sensor protein for glutamate. *Journal of the American Chemical Society* **134**, 7676-7678 (2012).
13. Sallin, O. et al. Semisynthetic biosensors for mapping cellular concentrations of nicotinamide adenine dinucleotides. *Elife* **7** (2018).
14. Chen, T.W. et al. Ultrasensitive fluorescent proteins for imaging neuronal activity. *Nature* **499**, 295-300 (2013).
15. Horikawa, K. et al. Spontaneous network activity visualized by ultrasensitive Ca<sup>2+</sup> indicators, yellow Cameleon-Nano. *Nat Methods* **7**, 729-732 (2010).
16. Moeyaert, B. et al. Improved methods for marking active neuron populations. *Nature communications* **9**, 4440 (2018).
17. Kotera, I., Iwasaki, T., Imamura, H., Noji, H. & Nagai, T. Reversible dimerization of *Aequorea victoria* fluorescent proteins increases the dynamic range of FRET-based indicators. *ACS chemical biology* **5**, 215-222 (2010).
18. Murakoshi, H., Shibata, A.C.E., Nakahata, Y. & Nabekura, J. A dark green fluorescent protein as an acceptor for measurement of Forster resonance energy transfer. *Sci Rep* **5**, 15334 (2015).
19. Yu, Q. et al. Semisynthetic sensor proteins enable metabolic assays at the point of care. *Science* **361**, 1122-1126 (2018).
20. Karplus, P.A. & Diederichs, K. Linking crystallographic model and data quality. *Science* **336**, 1030-1033 (2012).
21. McMahon, S.M. & Jackson, M.B. An Inconvenient Truth: Calcium Sensors Are Calcium Buffers. *Trends Neurosci* **41**, 880-884 (2018).
22. Nagai, T., Yamada, S., Tominaga, T., Ichikawa, M. & Miyawaki, A. Expanded dynamic range of fluorescent indicators for Ca<sup>2+</sup> by circularly permuted yellow fluorescent proteins. *Proc Natl Acad Sci U S A* **101**, 10554-10559 (2004).

23. Gibson, D.G. et al. Enzymatic assembly of DNA molecules up to several hundred kilobases. *Nat Methods* **6**, 343-345 (2009).
